# IKK $\alpha$ /CHUK Regulates Extracellular Matrix Remodeling Independent of Its Kinase Activity to Facilitate Articular Chondrocyte Differentiation

Eleonora Olivetto<sup>1,9</sup>, Miguel Otero<sup>2,9</sup>, Annalisa Astolfi<sup>3</sup>, Daniela Platano<sup>1</sup>, Annalisa Facchini<sup>4,5</sup>, Stefania Pagani<sup>1</sup>, Flavio Flamigni<sup>5</sup>, Andrea Facchini<sup>1,4</sup>, Mary B. Goldring<sup>2</sup>, Rosa Maria Borzi<sup>1</sup>, Kenneth B. Marcu<sup>1,6\*</sup>

**1** Laboratory of Immunorheumatology and Tissue Regeneration/RAMSES, Rizzoli Orthopedic Research Institute, Bologna, Italy, **2** Research Division, Hospital for Special Surgery and Weill Cornell Medical College, New York, New York, United States of America, **3** "G.Prodi" Cancer Research Center, University of Bologna, Bologna, Italy, **4** Medical and Surgical Sciences Department, University of Bologna, Bologna, Italy, **5** Biomedical and Neuromotor Sciences Department, University of Bologna, Bologna, Italy, **6** Biochemistry and Cell Biology Department, Stony Brook University, Stony Brook, New York, United States of America

## Abstract

**Background:** The non-canonical NF- $\kappa$ B activating kinase IKK $\alpha$ , encoded by *CHUK* (conserved-helix-loop-helix-ubiquitous-kinase), has been reported to modulate pro- or anti-inflammatory responses, cellular survival and cellular differentiation. Here, we have investigated the mechanism of action of IKK $\alpha$  as a novel effector of human and murine chondrocyte extracellular matrix (ECM) homeostasis and differentiation towards hypertrophy.

**Methodology/Principal Findings:** IKK $\alpha$  expression was ablated in primary human osteoarthritic (OA) chondrocytes and immature murine articular chondrocytes (iMACs) derived from *IKK $\alpha$ <sup>fl/fl</sup>:CreERT2* mice by retroviral-mediated stable shRNA transduction and Cre recombinase-dependent Lox P site recombination, respectively. MMP-10 was identified as a major target of IKK $\alpha$  in chondrocytes by mRNA profiling, quantitative RT-PCR analysis, immunohistochemistry and immunoblotting. ECM integrity, as assessed by type II collagen (COL2) deposition and the lack of MMP-dependent COL2 degradation products, was enhanced by IKK $\alpha$  ablation in mice. MMP-13 and total collagenase activities were significantly reduced, while TIMP-3 (tissue inhibitor of metalloproteinase-3) protein levels were enhanced in IKK $\alpha$ -deficient chondrocytes. IKK $\alpha$  deficiency suppressed chondrocyte differentiation, as shown by the quantitative inhibition of Alizarin red staining and the reduced expression of multiple chondrocyte differentiation effectors, including Runx2, Col10a1 and Vegfa. Importantly, the differentiation of IKK $\alpha$ -deficient chondrocytes was rescued by a kinase-dead IKK $\alpha$  protein mutant.

**Conclusions/Significance:** IKK $\alpha$  acts independent of its kinase activity to help drive chondrocyte differentiation towards a hypertrophic-like state. IKK $\alpha$  positively modulates ECM remodeling via multiple downstream targets (including MMP-10 and TIMP-3 at the mRNA and post-transcriptional levels, respectively) to maintain maximal MMP-13 activity, which is required for ECM remodeling leading to chondrocyte differentiation. Chondrocytes are the unique cell component in articular cartilage, which are quiescent and maintain ECM integrity during tissue homeostasis. In OA, chondrocytes reacquire the capacity to proliferate and differentiate and their activation results in pronounced cartilage degeneration. Thus, our findings are also of potential relevance for defining the onset and/or progression of OA disease.

**Citation:** Olivetto E, Otero M, Astolfi A, Platano D, Facchini A, et al. (2013) IKK $\alpha$ /CHUK Regulates Extracellular Matrix Remodeling Independent of Its Kinase Activity to Facilitate Articular Chondrocyte Differentiation. PLoS ONE 8(9): e73024. doi:10.1371/journal.pone.0073024

**Editor:** Florence Ruggiero, UMR CNRS 5242 - ENS de Lyon- Université Lyon 1, France

**Received:** March 29, 2013; **Accepted:** July 16, 2013; **Published:** September 2, 2013

**Copyright:** © 2013 Olivetto et al. This is an open-access article distributed under the terms of the Creative Commons Attribution License, which permits unrestricted use, distribution, and reproduction in any medium, provided the original author and source are credited.

**Funding:** This research was supported in part by National Institutes of Health (NIH) grants GM066882 (KBM) and RC4-AR060546 (MBG and KBM); the CARISBO Foundation of Bologna, Italy (EO, SP and Andrea Facchini); FIRB-MIUR of Italy grant RBAP10KCNS (Andrea Facchini, FF, DP, Annalisa Facchini and RMB); Fondi cinque per mille (Ministero della Salute, Italy) (Andrea Facchini, DP and RMB); POS-FESR 2007–2013, Emilia Romagna Region (EO); and also in part by an Arthritis Foundation postdoctoral fellowship (MO) and an Osteoarthritis Research Society International scholarship (EO). The funders had no role in study design, data collection and analysis, decision to publish, or preparation of the manuscript.

**Competing Interests:** The authors have declared that no competing interests exist.

\* E-mail: kenneth.marcu@stonybrook.edu

<sup>9</sup> These authors contributed equally to this work.

## Introduction

Cells differentiate in response to environmental signals from their neighbors and also from extracellular matrix (ECM) effectors. ECM proteins directly and indirectly modulate signal transduction pathways triggered by growth and differentiation factors [1]. Since ECM structural changes driven by enzyme-mediated remodeling

impact on cell differentiation cues, a thorough understanding of the mechanisms that control ECM formation and stability is of critical importance for defining the differentiation of a variety of tissues during mammalian development after birth and throughout adult life [1]. ECM remodeling is mediated by a large number of enzymes and the family of matrix metalloproteinases (MMPs) plays critical roles in this process [1].

Chondrocytes differentiating from mesenchymal progenitors have essential roles in cartilage formation and homeostasis and in skeletal development by synthesizing the templates, or cartilage anlagen, in a process termed chondrogenesis that results in limb formation [2]. After mesenchymal condensation and chondroprogenitor differentiation, chondrocytes proliferate, produce an elaborate ECM, terminally differentiate to hypertrophy, and then succumb to programmed cell death (PCD); the replacement of hypertrophic cartilage by bone culminates this process called endochondral ossification [2]. After birth a somewhat analogous chondrocyte differentiation process occurs in the postnatal growth plate, driving rapid skeletal growth [3]. During endochondral ossification hypertrophic chondrocytes undergo dramatic, stress-associated ECM remodeling, which has also been suggested as a “developmental model” to grasp the contributions of exacerbated environmental stresses in the onset and progression of osteoarthritis (OA) [4–9]. This concept is supported by findings in early OA cartilage lesions revealing up-regulation of chondrocyte differentiation-related genes, and by *in vivo* studies showing that alterations in ECM structural integrity or in effectors of progression to hypertrophy can lead to OA pathology [10]. Indeed, alterations in the mineral content and thickness of calcified cartilage, tidemark advancement and enhanced expression of COL10A1 (type X collagen protein), MMP-13 and Runx2 all occur in the context of OA disease to varying degrees, and simulate a recapitulation of chondrocyte differentiation towards a hypertrophic-like phenotype [9,11–14]. The Sox9 and Runx2 transcriptional activators function in an interrelated and stepwise manner at the early stages of chondrocyte differentiation and subsequent hypertrophic maturation [15]. Sox9 and Runx2 expression profiles oppose each other during chondrogenesis and terminal chondrocyte differentiation with the exception of the window between periarticular and proliferating chondrocytes [2]. Sox9 is essential for chondrocyte specification and early differentiation: and it also delays hypertrophic differentiation by controlling Runx2 expression and  $\beta$ -catenin signaling [16], which helps to maintain chondrocytes in an arrested state prior to the onset of hypertrophy. Runx2 instead drives chondrocyte hypertrophy prior to endochondral ossification [reviewed in [2]]. In addition, pro-inflammatory activation of the canonical NF- $\kappa$ B pathway was reported to inhibit mesenchymal chondrocytic differentiation through the transcriptional and post-transcriptional down-modulation of Sox9 mRNA [17,18], and NF- $\kappa$ B activation was also found to facilitate osteogenesis via BMP (bone morphogenic protein)-mediated induction of Runx2 [19]. Thus, due to the differential effects of Sox9 and Runx2 on chondrogenic differentiation, chronic NF- $\kappa$ B activation in OA chondrocytes could inhibit the early pre-hypertrophic phase, while simultaneously promoting the terminal hypertrophic phase and thereby contributing to abnormal ECM remodeling. ELF3, an epithelial cell-specific ETS family transcription factor, is also subject to NF- $\kappa$ B-dependent IL-1 $\beta$  signaling in chondrocytes wherein it suppresses *COL2A1* gene expression [20] and directly activates *MMP13* transcription [21]. Another direct target of the canonical NF- $\kappa$ B signaling, HIF2 $\alpha$ , plays a central role in OA cartilage, where it interconnects inflammatory ECM degradative processes with chondrocyte hypertrophy, controlling the expression of MMP13, NOS2 and VEGF among other factors [22,23]. Thus, elevated canonical NF- $\kappa$ B signaling in OA vs. normal articular chondrocytes (ACs) could contribute to cartilage degeneration in OA by affecting a number of downstream processes, particularly in response to extrinsic stress/inflammatory signals.

MMP-13 (collagenase 3) becomes involved in the process of chondrocyte ECM remodeling in the late hypertrophic zone of

growth plates prior to endochondral ossification, and is also the major type II collagen-degrading enzyme that drives erosion of the cartilage collagen network in OA disease [9,24–27]. Conditional ablations of *Mmp13* in murine chondrocytes and osteoblasts have shown that cartilage ECM remodeling is essential in controlling chondrocyte terminal differentiation to hypertrophy and subsequent apoptosis, as well as angiogenesis and osteoblast recruitment [28]. Moreover, global *Mmp13* gene knockout (KO) as well as conditional cartilage-specific *Mmp13* KO mice are protected against post-traumatic surgically induced OA [27,29]. Normally, articular chondrocytes (ACs) *in vivo* express low levels of MMP-13; but in sharp contrast, OA chondrocytes display enhanced levels and activities of MMP-13 and other matrix-degrading enzymes, which in part stem from the activated state of OA chondrocytes in response to abnormal stress and inflammatory signals [reviewed in [30]]. *Mmp13* transcriptional control depends on several key transcription factors, including ELF3, Runx2, AP-1 (cFos/cJun), p130<sup>cas</sup> nuclear matrix transcription factor 4 (NMP-4), and the canonical NF- $\kappa$ B subunits p65/p50 [21,31–34]. MMP-13, like most MMPs, is secreted in an inactive pro-form that is cleaved by specific proteases (including MMP-14, MMP-2 and MMP-10) to produce the active enzyme [35–37], and its activity is negatively controlled by tissue inhibitors of metalloproteinases (TIMPs) [38]. Thus, MMP-13 is subject to tight regulation at the transcriptional and post-translational levels, and a more thorough understanding of the regulatory factors that impact on its control in chondrocytes remains important.

We previously demonstrated that chondrocyte ECM remodeling and differentiation *in vitro* depends on MMP-13 [39] and on the NF- $\kappa$ B activating kinases IKK $\alpha$  and IKK $\beta$  [40]. Micromass and analogous 3-dimensional (3D) pellet cultures of primary articular chondrocytes (ACs) show “phenotypic plasticity” by recapitulating aspects of terminal differentiation to hypertrophy akin to that of mesenchymal stem cells undergoing chondrogenesis [41]. We found that ablating expression of either MMP-13 or IKK $\alpha$  in 3D differentiating cultures of human ACs dramatically stabilized their ECM, enhanced cell viability and strongly suppressed their differentiation towards a hypertrophic-like state [39,40]. IKK $\alpha$  KD articular chondrocytes (ACs) were unable to differentiate to a terminal, hypertrophic-like state [40]. Importantly, IKK $\alpha$  loss did not alter the level of MMP-13 protein but appeared to inhibit collagenase activity, as revealed by the pronounced suppression of type II collagen 3/4C neo-epitope fragments (COL2–3/4C) in IKK $\alpha$  KD pellet cultures [40]. Interestingly, the presence of MMP-13 and IKK $\alpha$  in differentiating chondrocytes impacted on the subcellular localization of Sox9 [39], with Sox9 largely displaying a peri-nuclear staining pattern in differentiating wild type (WT) chondrocyte pellets but instead localizing within the nuclei of chondrocytes lacking MMP-13 or IKK $\alpha$  [39]. Previous studies showed that Sox9 inhibits  $\beta$ -catenin-dependent signaling in chondrocytes [42] and other cell types [43]; and in accord with this earlier work, we showed an inverse correlation of Sox9 nuclear localization with  $\beta$ -catenin stability and activation status [39].

IKK $\alpha$  (also called IKK1 and encoded by the gene *CHUK* (conserved-helix-loop-helix-ubiquitous kinase) is a stoichiometric component of the NF- $\kappa$ B activating IKK signalosome complex; and it also has a variety of important functions not associated with NF- $\kappa$ B signaling. IKK $\alpha$ /CHUK was originally discovered as a ubiquitously expressed, evolutionarily conserved protein with a carboxy-terminal helix-loop-helix and amino terminal serine-threonine kinase domains [44]. IKK $\alpha$ /CHUK normally resides in the cytoplasmic IKK complex with the related kinase IKK $\beta$  (also called IKK2) and a docking/scaffold-like protein NF- $\kappa$ B

essential modulator (NEMO, also called IKK $\gamma$ ) that licenses IKK $\beta$  activation in response to a host of stress-like stimuli. Activated IKK $\beta$  phosphorylates I $\kappa$ B $\alpha$ , targeting it for proteasomal destruction, thereby liberating canonical NF- $\kappa$ B p65/p50 to drive pro-inflammatory gene expression programs [reviewed in [45–48]]. In contrast to IKK $\beta$ , IKK $\alpha$  functions in the IKK signalosome as the essential kinase that activates the non-canonical NF- $\kappa$ B pathway [reviewed in [45–47,49]]. IKK $\alpha$ -phosphorylated p100 is processed by the proteasome to liberate the NF- $\kappa$ B p52 subunit from its amino terminus, which functions in NF- $\kappa$ B RelB/p52 heterodimers to activate NF- $\kappa$ B target genes regulating adaptive immune responses, cellular survival, and differentiation programs [50,51]. In addition, IKK $\alpha$ /CHUK functions as a chromatin activating kinase that drives gene transcription in part by modifying nucleosomal histones, interfering with the activities of transcriptional co-repressors, and also by modifying the activities of transcriptional co-activators [52–55].

Importantly, IKK $\alpha$ /CHUK also functions as an essential positive effector of terminal keratinocyte differentiation [56–58], but independent of both NF- $\kappa$ B and its serine-threonine kinase activity [59–61]. During terminal keratinocyte differentiation and cell cycle exit, IKK $\alpha$  controls the transcription of several c-Myc antagonists, including Mad1, Mad2, and Ovol1, by associating with TGF $\beta$ -regulated Smad2 and Smad3 heterodimers independent of Smad4 [61]. Due to a complete blockade of terminal keratinocyte differentiation, IKK $\alpha$  KO mice have a perinatal lethal phenotype and a bottle-shaped body morphology with limbs and tails wrapped in thick, sticky epidermal tissue preventing their extension from the body trunk in addition to some skeletal abnormalities likely due to asymmetric ossification effects [56–58]. Importantly, IKK $\alpha$ <sup>AA/AA</sup> knock-in mice (wherein alanines replace Ser<sup>176</sup> and Ser<sup>180</sup> T-loop activating phosphorylation sites in IKK $\alpha$  preventing its activation by upstream signaling pathways) are morphologically normal and fertile [62]. Subsequent work showed that abnormal skeletal development in conventional IKK $\alpha$  KO mice was a consequence of failed epidermal differentiation that disengaged normal epidermal-mesodermal interactions and the accumulation of abnormally high levels of specific fibroblast growth factors (FGFs), including FGF-8 and 18 [60]. The latter defective skeletal phenotype is probably due to collateral effects of specific FGFs on BMP (bone morphogenic protein) signaling leading to localized alterations in chondrogenesis or ossification [63–65]. Normal skeletal development was restored in IKK $\alpha$ <sup>-/-</sup> mice by rescuing IKK $\alpha$  expression solely in the epidermis (*CK14-Ikk $\alpha$*  mice). Because the basal keratinocyte-specific CK14-Ikk $\alpha$  transgene was not expressed in esophageal stratified epithelial tissue, *CK14-Ikk $\alpha$*  mice died 2 days after birth due to a suckling defect stemming from a fused esophagus, [60]. Consequently, the above studies were unable to determine if the IKK $\alpha$  protein, independent of its kinase activity, functionally impacts on the differentiation programs of other cell types as mice progress towards adulthood.

Herein, we have begun to define the mechanisms whereby IKK $\alpha$  positively facilitates articular chondrocyte (AC) ECM remodeling and subsequent chondrocyte differentiation towards hypertrophy. We find that IKK $\alpha$  acts independent of its kinase activity as a mediator of differentiation of both human and murine primary ACs. Our results indicate that IKK $\alpha$  drives chondrocyte differentiation by acting as a positive effector of MMP-13 enzymatic activity via a two pronged mechanism involving the up-regulation of MMP-10 (stromelysin-2) mRNA and the suppression of TIMP-3 accumulation.

## Methods

### Ethics Statement

Research involving human OA patient cartilage tissue samples at the Rizzoli Orthopedic Institute (IOR) was periodically reviewed and approved by the ethics committee/institutional review board of the Institute (“Ethical Committee of IOR), which included documentation of written patient consent forms. Prior to the retrieval of tissues from surgeons, all patient identifiers were removed from tissue samples which were coded by arbitrary number designations to distinguish them solely for experimental purposes.

All work with mice was approved by the IACUC committee of Stony Brook University in accordance with USA NIH guidelines for the use of animals in biomedical research and involved only *in vitro* experiments with knee joint cartilage from 5- to 6-day old mouse pups, which were euthanized by an IACUC approved protocol prior to knee joint dissection.

### Animals

IKK $\alpha$ <sup>f/f</sup>:CreERT2 homozygous mice containing IKK $\alpha$  alleles flanked by LoxP recombination sites and a 4-hydroxy-tamoxifen (4-OHT) inducible CreERT2 recombinase gene in their Rosa26 loci have been previously described [66]. Exposure of any primary cells isolated from these mice (including primary ACs) to 100 nM 4-OHT {solubilized in 95% ethanol (EtOH)} over a 2 to 3 day time span deletes both IKK $\alpha$  alleles with the subsequent ablation of the endogenous pool of IKK $\alpha$  protein and yields IKK $\alpha$  KO cells.

### Cell Culture

Human primary chondrocytes were isolated from articular cartilage obtained from OA patients undergoing total knee replacement, with approval by IOR ethical committee and written patient consent (as per above Ethics Statement). Chondrocytes were isolated from articular cartilage tissue by sequential enzymatic digestion as previously described [67], and expanded for 1 week in low density monolayer cultures prior to stable transduction with retroviruses or seeding into differentiating pellet cultures as previously described [40,67]. For experiments to quantify the secretion of specific proteins including activated MMP-13 and activated total collagenases (described in more detail below), conditioned media from pellet cultures were collected with or without overnight serum starvation, centrifuged to eliminate the cellular debris and stored at  $-20^{\circ}\text{C}$  for subsequent analysis.

Immature murine articular chondrocytes (iMACs) were isolated from the knee joints of 5- to 6-day-old IKK $\alpha$ <sup>f/f</sup>:CreERT2 mouse pups as described [68,69]. After collagenase digestion primary mouse ACs were expanded in DMEM/F12 media supplemented with 10% FBS and antibiotics prior to performing retroviral transductions or inducing their differentiation in high density monolayers or in pellet cultures. For high density monolayer cultures, primary mouse chondrocytes were plated at  $2.5 \times 10^4$  cells/cm<sup>2</sup> in DMEM/F12 supplemented with 10% FBS, antibiotics, 1X ITS Universal Culture Supplement (BDBiosciences), and 50  $\mu\text{g}/\text{ml}$  of ascorbic acid (Sigma Aldrich), and kept in confluent cultures for the indicated times with medium change every 48 h. Endogenous IKK $\alpha$  expression was ablated in passage one (P1) IKK $\alpha$ <sup>f/f</sup>:CreERT2 iMACs by 2 to 3 days exposure to 100 nM 4-OHT with EtOH/vehicle treated IKK $\alpha$ <sup>f/f</sup>:CreERT2 iMACs serving as IKK $\alpha$  WT control cells.

## Retroviral Transductions

Knock-down (KD) of IKK $\alpha$  in human OA chondrocytes was achieved by stable transduction of early-passage primary chondrocytes with retroviral vectors expressing a human IKK $\alpha$ -targeted specific shRNA and a puromycin resistance gene, as previously described [40]. Briefly, retroviral transductions were performed by spinoculation with amphotyped viruses prepared with Phoenix A packaging cells; and the resultant IKK $\alpha$  KD chondrocytes were compared with matched wild-type (WT) cells transduced by a puromycin resistance retrovirus harboring a GL2 firefly luciferase-specific shRNA [40].

Rescue of IKK $\alpha$  expression in IKK $\alpha$  KD human OA chondrocytes or in 4-OHT-induced IKK $\alpha$  KO IKK $\alpha$ <sup>f/f</sup>; CreERT2 iMACs was achieved utilizing retroviral vectors co-

expressing either neomycin or puromycin resistance, respectively, and a WT or a kinase-dead mutant (K44M) form of murine IKK $\alpha$ , as previously described [70–72]. Briefly, viral supernatants in the presence of 8  $\mu$ g/ml polybrene were applied to cells by centrifugation at  $\sim$ 1,100 g at 32°C for 45 min. with continued incubation for 5 h at 32°C in 5% CO<sub>2</sub> followed by replacement with regular growth medium. At 48 h post-retroviral transduction, primary human OA chondrocytes were selected for neomycin resistance (400  $\mu$ g/ml) over 12 days, whereas iMACs were selected for puromycin resistance (1.5  $\mu$ g/ml) over 6 days. Stable retroviral transductions of primary human OA ACs were done with neat (undiluted) viral supernatants prepared with Phoenix A packaging cells [40], while iMACs were infected with retroviral supernatants diluted 3-fold in complete media.

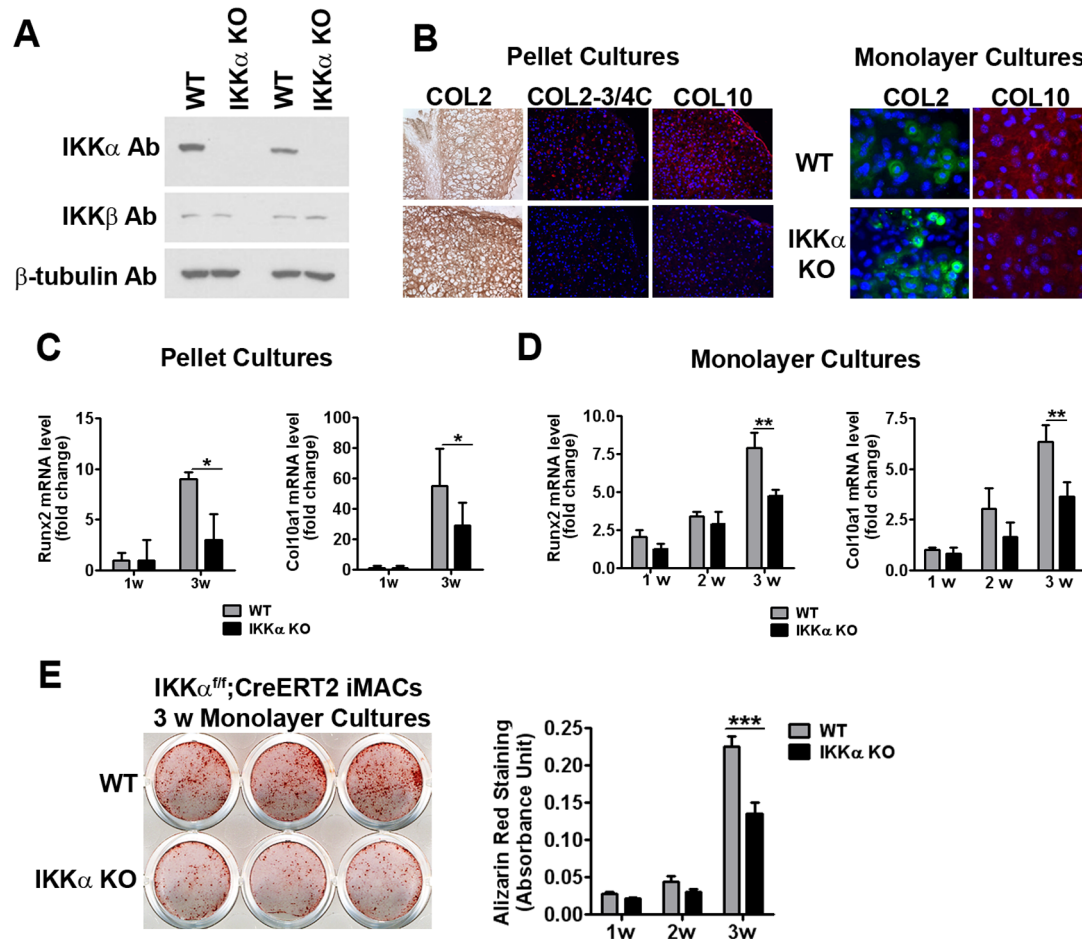

**Figure 1. Effects of IKK $\alpha$  ablation on iMAC differentiation.** (A) IKK $\alpha$  immunoblot of total cell lysates from two independent experiments using IKK $\alpha$ <sup>f/f</sup>;CreERT2 immature articular chondrocytes (iMACs) treated with EtOH vehicle (WT control) or 4-OHT (IKK $\alpha$ -KO) for 72 hours. IKK $\beta$  and  $\beta$ -tubulin were used as 4-OHT specificity and protein loading controls, respectively. (B) (Left): Relative levels of IHC staining with COL2, COL2-3/4C and COL10 antibodies in 3-week pellet cultures of IKK $\alpha$ <sup>f/f</sup>;CreERT2 iMACs treated with EtOH vehicle (WT control) or 4-OHT (IKK $\alpha$  KO). Results are representative of 3 experiments. (Right): COL2 and COL10 immunopositive cells in 4-OHT (IKK $\alpha$  KO) treated IKK $\alpha$ <sup>f/f</sup>;CreERT2 iMAC 3-week monolayer cultures vs. their matched WT (EtOH treated) controls. Results are representative of 2 (COL2) and 3 (COL10) independent experiments (Original magnification, 200X). Merged immunofluorescence images are shown. COL2 (monolayer cultures): green; COL10 (pellet and monolayer cultures): red; COL2-3/4C (pellet cultures): red; DAPI: blue. See Figure S1 for comparable results of other experiments. (C) qRT-PCR analysis of Runx2 (left) and Col10a1 (right) RNA in EtOH (WT) or 4-OHT (IKK $\alpha$  KO) treated IKK $\alpha$ <sup>f/f</sup>;CreERT2 iMAC 1- and 3-week pellet cultures. Data are displayed as fold-change of 3-week vs. 1-week cultures, and shown as mean  $\pm$  S.E.M. of 3 experiments. \* $p$ <0.05 by Student's t-test. (D) qRT-PCR analysis of Runx2 and Col10a1 RNAs in IKK $\alpha$ <sup>f/f</sup>;CreERT2 iMAC monolayer cultures treated with EtOH (WT) or 4-OHT (IKK $\alpha$  KO). Data are shown as fold change relative to 72 hour EtOH (WT) and 4-OHT (IKK $\alpha$  KO) treated cultures of at least 4 experiments. \*\* $p$ <0.01 by ANOVA. (E) (Left): Representative Alizarin red staining of EtOH (WT) and 4-OHT (IKK $\alpha$  KO) treated 3-week IKK $\alpha$ <sup>f/f</sup>;CreERT2 iMAC high density monolayer cultures. (Right): Quantification of Alizarin red staining after dye solubilization of EtOH (WT) and 4-OHT (IKK $\alpha$  KO) monolayer cultures differentiated as indicated. Data are mean  $\pm$  S.E.M. of 3 experiments, each performed in duplicate. \*\*\* $p$ <0.001 by ANOVA. doi:10.1371/journal.pone.0073024.g001

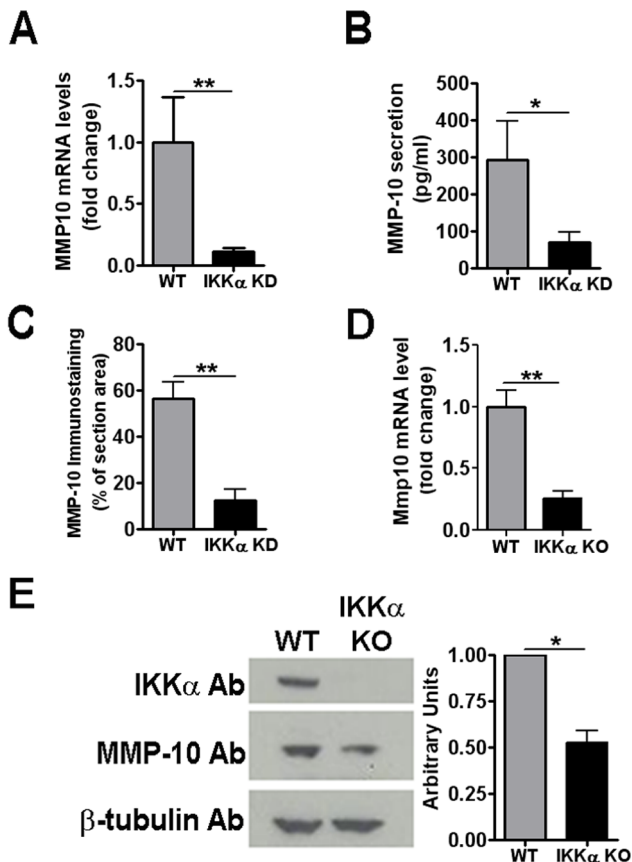

**Figure 2. Effects of IKK $\alpha$  loss on MMP-10 levels in differentiating human and murine chondrocytes.** (A) qRT-PCR analysis of MMP10 RNA in 1-week differentiated pellet cultures of IKK $\alpha$  KD vs. WT (GL2 control) human OA chondrocytes. Results were obtained with primary chondrocytes derived from 8 OA patients. Data are shown as mean  $\pm$  S.E.M. (error bars) and represented as fold-change vs. WT (set as 1.0). \*\* $p < 0.01$  by Wilcoxon matched pair test. (B): MMP-10 protein secretion quantified by immunoassay of conditioned medium (performed as described in Methods) of 1-week differentiated pellet cultures (N=5). Data are shown as mean  $\pm$  S.E.M. \* $p < 0.05$  by Wilcoxon matched pair test. (C) MMP-10 immunostaining in 1-week differentiated pellet cultures of IKK $\alpha$  KD vs. WT (GL2 control) human OA chondrocytes (N=3). Immunostaining expressed as percentage of signal per  $\mu\text{m}^2$  unit area. \*\* $p < 0.01$  by Student's t test. Representative images of MMP-10 immunostained micromasses are presented in Figure 3. (D) qRT-PCR analysis of Mmp10 RNA in 4-OHT (IKK $\alpha$  KO) or EtOH vehicle-treated (WT) 1-week high density chondrocyte monolayer cultures of IKK $\alpha^{fl/fl};\text{CreERT2}$  iMACs. Data are represented as fold-change relative to the WT control (set as 1.0) and shown as mean  $\pm$  S.E.M. of 3 independent experiments. \*\* $p < 0.01$  by Student's t-test. (E) (Left): Representative MMP-10 immunoblot of whole cell lysates of 1-week EtOH (WT) and 4-OHT (IKK $\alpha$  KO) treated IKK $\alpha^{fl/fl};\text{CreERT2}$  high density iMAC monolayer cultures. (Right): Densitometric analysis of MMP-10 immunoblots shown as mean  $\pm$  S.E.M. of 3 independent experiments. \* $p < 0.05$  by Student's t test. doi:10.1371/journal.pone.0073024.g002

### Microarray Analysis

Total cellular RNAs were isolated from pellet cultures of human OA chondrocytes, as previously described [67], purified by RNeasy Mini spin columns (QIAGEN), labeled following the Affymetrix GeneChip Expression Analysis protocol, and hybridized to Affymetrix HG-U133Plus arrays. Affymetrix CEL files were background-subtracted and normalized by rma (Robust Multichip Average) using a Bioconductor package essentially as previously described [73]. Differential gene expression was

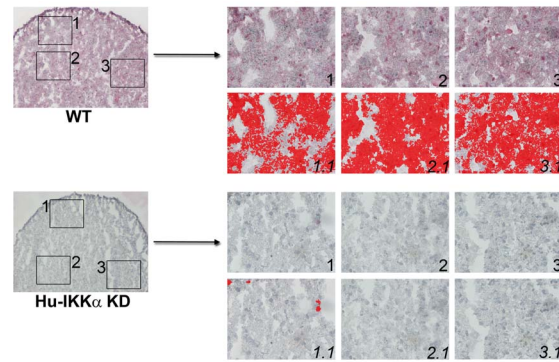

**Figure 3. Effects of IKK $\alpha$  ablation on MMP-10 protein levels in human OA chondrocyte micromass cultures.** MMP-10 immunostaining in 1-week differentiated pellet cultures of IKK $\alpha$  KD vs. matched WT (GL2 control) human OA chondrocytes. Global views of micromass sphere sections (100X magnification) are shown on the left; and three random fields at 400X magnification, which were submitted to quantitative image analysis appear to the right. Antibody stained images are shown in the right side upper rows (labeled as 1, 2 & 3), with each 400X field submitted to analysis by Nikon Imaging Software in the lower rows (1.1, 2.1 & 3.1). For each sample an IHC staining threshold was established based on an antibody isotype control. Antibody staining of MMP-10 is in red in conjunction with hematoxylin (blue) nuclear counterstaining. Data are representative examples of multiple sections of micromasses prepared with ACs of 3 OA patients; and results of all such experiments are presented as statistically analyzed bar graphs in Figure 2C. doi:10.1371/journal.pone.0073024.g003

evaluated by a modified t test (limma,  $p \text{ val} < 0.02$ ) and hierarchical clustering was done with Pearson correlation metric and complete linkage analysis also essentially as previously described [70,71,73]. Routine quality controls were performed on array data to check for the presence of artifacts and for the consistency of normalization across arrays, showing that results were of good quality and data were comparable.

### Reverse Transcriptase Quantitative PCR (qRT-PCR) Analysis

Total cellular RNA was isolated from pellet cultures of human OA chondrocytes and submitted to qRT-PCR as previously described [40,67]. PCR primer pairs for the following human genes were used: *GAPDH* (NM\_002046, forward 579–598: TGGTATCGTGGAGGACTCA and reverse 701–683: GCAGGGATGATGTTCTGGA); *TIMP3* (NM\_000362.4 forward 1193–1211: CCTTGGCTCGGCTCATC and reverse 1313–1333: GGATCACGATGTCGGAGTTG) and *MMP10* (NM\_002425.2, forward 1278–1298: GCCAGTCCATGGAGCAAGGCT; and reverse 1472–1449: TCGCCTAGCAATGTAACCAGCTGT). Annealing temperatures were 58°C for *GAPDH* and *MMP10* and 60°C for *TIMP3*; mRNA expression levels were normalized to the expression of *GAPDH*, as previously described [21,40,74].

For murine chondrocytes total cellular RNAs were isolated from monolayer and pellet cultures using TRIzol<sup>®</sup> reagent (Life Technologies) followed by DNaseI treatment and column cleanup (QIAGEN); and 250 ng of total RNA were reverse transcribed using the QuantiTect Reverse Transcription Kit (QIAGEN) according to the manufacturer's instructions. Amplifications were carried out using SYBR Green I-based RT-PCR on the Opticon 2 Real Time PCR Detector System (BioRad), using the following PCR primers: *Col10a1* (NM\_009925.4; forward 5'-ACGCATCTCCCAGCACCAGAATC-3' and reverse 5'-GGGG

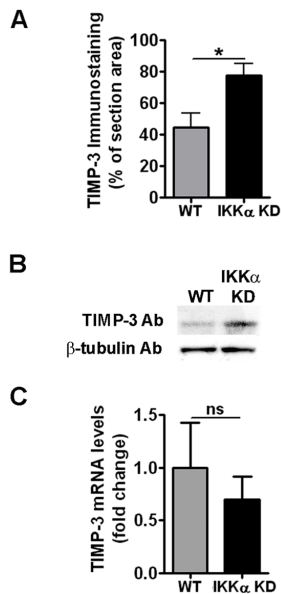

**Figure 4. Effects of IKK $\alpha$  KD on TIMP-3 levels in human OA chondrocyte micromass cultures.** (A) Quantitative image analysis for TIMP-3 immunostaining of 1-week IKK $\alpha$  KD human pellet cultures vs. matched WT (GL2 control) for 3 OA patients. Results are shown as mean  $\pm$  S.E.M. \* $p$ <0.05 by Student's t-test. Representative images of TIMP-3 immunostained micromasses are presented in Figure 5. (B) TIMP-3 immunoblot of whole cell lysates of IKK $\alpha$  KD and matched WT (GL2 control) of 1-week human chondrocyte pellet cultures of one representative OA patient, with  $\beta$ -tubulin as protein loading control. (C) qRT-PCR analysis of TIMP3 mRNA in 1-week pellet cultures of IKK $\alpha$ KD human chondrocytes vs. matched WT (GL2) controls (N=6). Results are shown as mean  $\pm$  S.E.M. ns=not significant. doi:10.1371/journal.pone.0073024.g004

CTAGCAAGTGGGCCCT-3'); *Runx2* (NM\_001145920.2; forward 5'-TCCCCGGAACCAAGAAGGCA-3' and reverse 5'-AGGGAGGGCCGTGGGTTCTG-3'); *Mmp10* (NM\_019471.2; forward 5'-GCAGCCCATGAACCTTGCCACT-3' and reverse 5'-AGGGACCGCTCCATACAGGG-3'); *Mmp13* (NM\_008607.2; forward 5'-ATGGTCCAGGCGATGAAGACCC-3' and reverse 5'-GTGCAGGCGCCAGAAGAATCTGT-3'); *Vegfa* (NM\_001025250.3; forward 5'-CTCGCAGTCCGAGCCGGAGA-3' and reverse 5'-CAGCCTGGGACCACCTTGGC-3'); *Hprt* (NM\_013556.2; forward 5'-CAAACCTTGCTTTCCCTGGT-3' and reverse 5'-CAAGGGCATATCCAACAACA-3'); *Gapdh* (NM\_008084.2; forward 5'-GGGCTCATGACCA-CAGTCCATGC-3' and reverse 5'-CCTTGCCACAGCCTTGGCA-3'). Annealing temperatures were 57°C for *Runx2*, *Mmp10* and *Hprt*, and 60°C for *Col10a1*, *Mmp13*, *Vegfa* and *Gapdh*. The data were calculated as the ratio of each gene to *Hprt1* using the  $2^{-\Delta\Delta C_t}$  method for relative quantification [75]. *Gapdh* was utilized as an additional housekeeping gene control. Amplification efficiencies were calculated for all primers utilizing serial dilutions of pooled cDNA samples; melting curves were generated to ensure a single gene-specific peak, and no-template controls were included for each run and each set of primers to control for non-specific amplifications.

### Immunoblotting

For detecting TIMP-3 protein, pellet cultures were lysed and total cellular proteins representing the content of ~80,000 cells were resolved on a 4–12% precast gradient gel (Invitrogen) and transferred to a polyvinylidene difluoride (PVDF) membrane

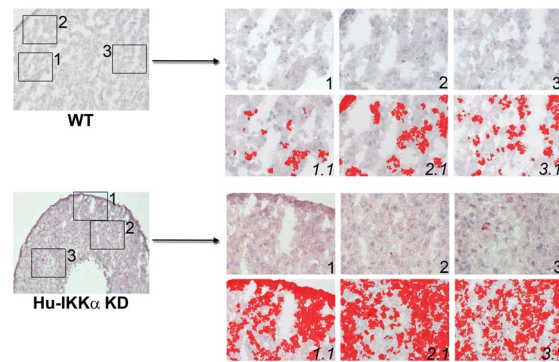

**Figure 5. IKK $\alpha$  KD increases TIMP-3 protein levels in human OA chondrocyte micromass cultures.** TIMP-3 immunostaining in 1-week differentiated pellet cultures of IKK $\alpha$  KD vs. matched WT (GL2 control) human OA chondrocytes. Global views of micromass sphere sections (100X magnification) are shown on the left; and three random fields at 400X magnification, which were submitted to quantitative image analysis, appear to the right. Antibody stained images are shown in the right side upper rows (labeled as 1, 2 & 3), with each 400X field submitted to analysis by Nikon Imaging Software in the lower rows (1.1, 2.1 & 3.1). For each sample an IHC staining threshold was established based on an antibody isotype control. Antibody staining of TIMP-3 is in red in conjunction with hematoxylin (blue) nuclear counterstaining. Data are representative examples of multiple sections of micromasses prepared with ACs of 3 OA patients; and results of all such experiments are presented as statistically analyzed bar graphs in Figure 4A. doi:10.1371/journal.pone.0073024.g005

(Millipore). Signals were detected with secondary antibodies and revealed with an ECL Advance kit (Amersham) as previously described [39]. TIMP-3 protein in 1-week pellet cultures was detected using a mouse monoclonal anti-human TIMP-3 antibody (R&D Systems). To detect exogenous IKK $\alpha$  proteins introduced by retroviral transduction, whole cell lysates from monolayer cultures were evaluated by Western blotting on membranes that were probed initially with rabbit polyclonal anti-IKK $\alpha$  antibody (CST Inc.) and subsequently stripped and re-probed with a rabbit polyclonal anti-hemagglutinin epitope (HA) antibody (Zymed) to specifically detect HA-tagged murine WT IKK $\alpha$  and mutant IKK $\alpha$ (K44M) proteins. All blots were re-probed with a rabbit polyclonal anti- $\beta$ -tubulin antibody (SIGMA) as protein loading control.

Immunoblotting of proteins in mouse chondrocytes was performed with whole cell lysates of monolayer cultures, transferred to PVDF membranes and incubated with primary antibodies against IKK $\alpha$  (CST Inc.), IKK $\beta$  (CST Inc.), HA (Zymed), or MMP-10 (Novus Biological).  $\beta$ -tubulin (Abcam) was used as loading control. Relative abundance of MMP-10 protein was determined by densitometry, using ImageJ software (NIH, Bethesda, MD), and normalized to  $\beta$ -tubulin.

### Immunohistochemistry and Immunocytochemistry

Frozen sections (5  $\mu$ m) of 1-week pellet cultures of human OA chondrocytes were analyzed by immunohistochemistry (IHC) in conjunction with hematoxylin nuclear counterstaining (CAT hematoxylin – BIOCARE Medical) using antibodies against type II collagen (COL2), Runx2, type x collagen (COL10) and the antibody C1,2C (IBEX Inc.) against a specific COL2–3/4C neopeptide, as previously described [40]. TIMP-1, TIMP-2, TIMP-3 and TIMP-4 proteins were detected with mouse monoclonal antibodies (R&D Systems). MMP-10 protein was detected by a rabbit polyclonal anti-human/mouse antibody (Novus Biological). Differentiating micromasses were analyzed for the presence and

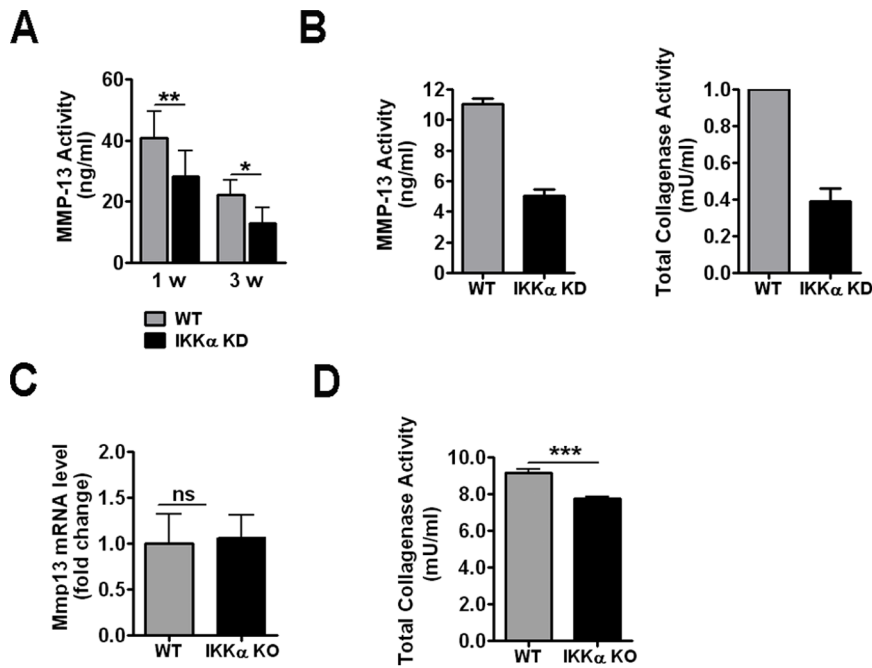

**Figure 6. Effects of IKK $\alpha$  loss on MMP-13 and total collagenase activities.** (A) MMP-13 activity in conditioned medium of 1-week (N=9) and 3-week (N=7) IKK $\alpha$  KD pellet cultures of human OA chondrocytes. Data are represented as mean  $\pm$  S.E.M. (error bars). \* $p$ <0.05, \*\* $p$ <0.01 by Wilcoxon matched pair test. (B) MMP-13 (Left) and total collagenase (Right) activities in serum-free conditioned media of 1-week IKK $\alpha$  KD and matched WT (GL2 control) pellet cultures of ACs from 2 OA patients. Data are represented as mean  $\pm$  S.E.M. (error bars). (C) qRT-PCR analysis of Mmp13 expression in 1-week high density monolayer cultures of IKK $\alpha^{fl/fl}$ ;CreERT2 iMACs treated with EtOH (WT control) or 4-OHT (IKK $\alpha$  KO). Data are from 3 independent experiments and shown as mean  $\pm$  S.E.M. (error bars). ns=not significant by Student's t test. (D) Total collagenase activity quantified in the conditioned medium of 1-week EtOH (WT control) and 4-OHT (IKK $\alpha$  KO) treated IKK $\alpha^{fl/fl}$ ;CreERT2 iMACs. \*\*\* $p$ <0.001 by Student's t test.

doi:10.1371/journal.pone.0073024.g006

relative abundance of the above proteins by *in situ* antibody staining followed by quantitative imaging analysis, as we had previously described [39,40]. Briefly, this quantitative, *in situ* technique involved the analysis of 4–5 400X magnified fields obtained in 2 sequential sections from each micromass sphere, which were processed and quantified with a Nikon Eclipse 90i microscope equipped with Nikon Imaging Software elements. Relative protein levels were set to a threshold level based on isotype control staining; and the data were expressed as the percentage of signals per  $\mu\text{m}^2$  unit area. Control experiments verified that quantified results obtained with 2 sequential micromass sections were comparable to data obtained with sections from different depths within each micromass sphere (data not shown).

*In situ* levels of proteins were also visualized in 1- and 3-week pellet and high density monolayer cultures of mouse primary chondrocytes. Briefly, OCT-embedded pellets were sectioned into 5  $\mu\text{m}$  slices and incubated with specific antibodies against COL2 (Santa Cruz Biotechnology, Inc.), followed by incubation with an anti-goat horseradish peroxidase (HRP) conjugated secondary antibody (Santa Cruz Biotechnology, Inc.); or rabbit polyclonal antibodies against COL10 (Abcam), MMP-10 (Novus Biological) or C1,2C (IBEX) followed by incubation with an anti-rabbit Alexa Fluor<sup>®</sup> 555 conjugated secondary antibody (CST Inc.). Immunocytochemistry was performed in high-density monolayer cultures of mouse primary chondrocytes seeded in culture-treated coverslips (NUNC). At 3 weeks after plating, cells were fixed and incubated with antibodies against COL2 (Santa Cruz Biotechnology, Inc.) or COL10 (Abcam) followed by incubation with anti-goat Alexa Fluor 488 conjugated (Life Technologies) or anti-rabbit

Alexa Fluor<sup>®</sup> 555 conjugated antibodies (CST Inc.), respectively. Sections were mounted with anti-fade mounting medium containing DAPI (Vector Labs). Immunostainings were visualized with a fluorescence microscope (NIKON ECLIPSE E800) and images were taken (SPOT RT Diagnostic).

#### MMP-10, MMP-13 and Total Collagenase Assays

MMP-10 protein levels present in the conditioned media of 1-week pellet cultures of human OA chondrocytes were quantified by the Quantikine<sup>®</sup> Human Pro-MMP-10 ELISA-based assay (R&D Systems), which employs a quantitative sandwich enzyme immunoassay technique to evaluate MMP-10 pro-enzyme levels. Standards and undiluted culture medium were incubated for 2 h at room temperature in a microplate pre-coated with a monoclonal anti-human MMP-10 antibody; after washing, a monoclonal HRP-conjugated anti-human MMP-10 antibody was added to the wells. After washing to remove unbound antibody, substrate solution (tetramethylbenzidine+hydrogen peroxide) was added to the wells with color developing in proportion to the amount of pro-MMP-10. Optical densities at 450 nm were recorded within 30 min with a microplate reader (ELISA reader Multiskan HCC340\_Labsystems) and protein quantities in pg/ml were determined on a standard curve. Sample diluent background signals were subtracted from each value. The standard curve was generated by reducing the data with a software package that provides four parametric logistic curve fit (Genesis Lite 3.03, Life Sciences (UK) Ltd.).

MMP-13 activity in the conditioned medium of 1- to 3-week human OA chondrocyte pellet cultures was quantified with a SensoLyte<sup>®</sup> Plus 520 MMP-13 Assay Kit (AnaSpec). A monoclo-

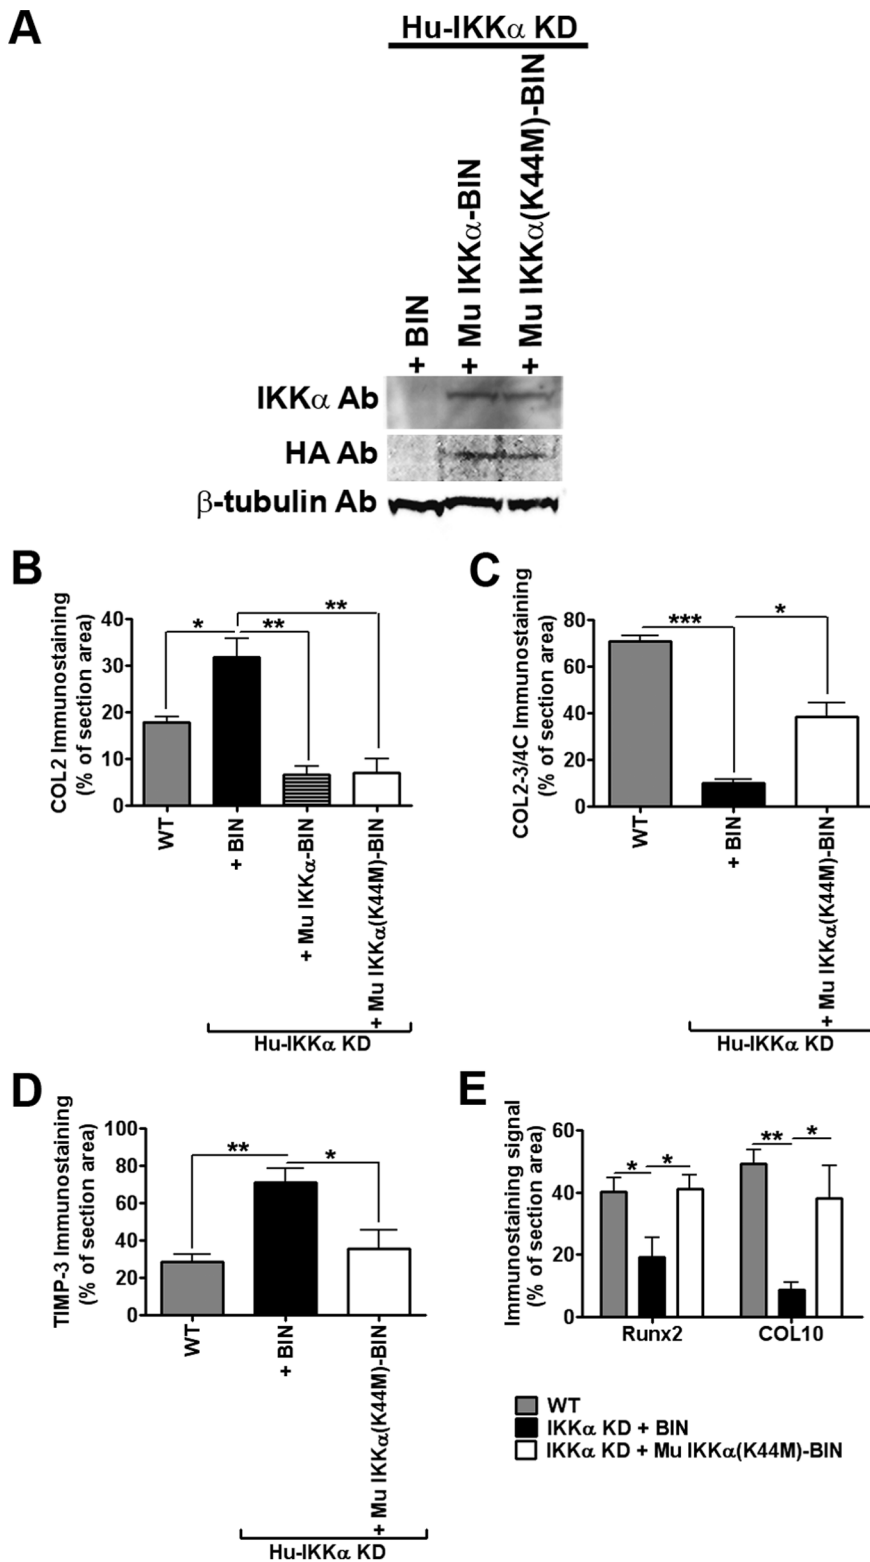

**Figure 7. Effects of IKK $\alpha$  on human chondrocyte ECM remodeling and differentiation are independent of its kinase activity.** (A) Immunoblots of whole cell lysates of monolayer cultures of primary human (Hu) IKK $\alpha$  KD chondrocytes, which were stably transduced with a neomycin-resistant retroviral vector (BIN), or with BIN retroviral vectors co-expressing WT murine IKK $\alpha$  (Mu IKK $\alpha$ -BIN) or a kinase-dead murine IKK $\alpha$  mutant {Mu IKK $\alpha$ (K44M)-BIN}. Blots were first probed with an anti-IKK $\alpha$  antibody and then sequentially re-probed with anti-HA and  $\beta$ -tubulin antibodies. (B) Quantitative image analysis of COL2 immunostaining in 1-week pellet cultures of primary human chondrocytes of 3 OA patients: WT (GL2 control), IKK $\alpha$  KD cells with BIN, IKK $\alpha$  KD cells with Mu IKK $\alpha$ -BIN or IKK $\alpha$  KD cells with Mu IKK $\alpha$ (K44M)-BIN. Data are shown as mean  $\pm$  S.E.M (error bars). \* $p$ <0.05 and \*\* $p$ <0.01 by Student's t-test. (C) Quantitative image analysis of C1,2C immunostaining in the same WT (GL2 control), Hu-IKK $\alpha$  KD+BIN and Hu-IKK $\alpha$  KD+Mu IKK $\alpha$ (K44M)-BIN samples as in panel B. Data are shown as mean  $\pm$  S.E.M. (error bars). \* $p$ <0.05 and \*\*\* $p$ <0.001 by



Student's t-test. **(D)** Quantitative image analysis of TIMP-3 immunostaining of WT (GL2 control), Hu-IKK $\alpha$  KD+BIN and Hu-IKK $\alpha$  KD+Mu IKK $\alpha$ (K44M)-BIN of 3-week pellet cultures prepared with primary ACs derived from 3 OA patients. \* $p < 0.05$  and \*\* $p < 0.01$  by Student's t test. **(E)** Quantitative image analysis of Runx2 and COL10 immunostaining of the same WT (GL2 control), Hu-IKK $\alpha$  KD+BIN and Hu-IKK $\alpha$  KD+Mu IKK $\alpha$ (K44M)-BIN samples in panels B and C. Data are shown as mean  $\pm$  S.E.M. (error bars). \* $p < 0.05$  and \*\* $p < 0.01$  by Student's t-test. Representative examples of COL2, COL2-3/4, TIMP-3, Runx2 and COL10 immunostained micromasses, which were submitted to quantitative imaging analysis, are respectively shown in Figures 8–12. doi:10.1371/journal.pone.0073024.g007

nal anti-human-MMP-13 antibody was coated on microplates to pull down both pro and active forms of MMP-13 from undiluted culture medium. Standards and undiluted medium were incubated for 2 h at room temperature in pre-coated microplates. Activated levels of MMP-13 were detected with a 5-FAM/QXL<sup>TM</sup>520 FRET peptide substrate. The fluorescence of 5-FAM (fluorophore) was quenched by QXL<sup>TM</sup>520 (quencher) in the intact FRET peptide. Upon MMP-13 cleavage, the fluorescence of 5-FAM was recovered and monitored at Ex/Em = 490 $\pm$ 20 nm/520 $\pm$ 20 nm. Substrate was added, and after 1 hour incubation, the fluorescence values were taken with a microplate reader (SpectraMax Gemini\_Molecular Devices). The MMP-13 standard curve was generated by incubating serial dilutions of recombinant pro-MMP-13 in a microtiter plate together with 1 mM APMA (4-

amino-phenyl-mercuric acetate) activator; and a four parametric logistic curve-fit was obtained with Genesis Lite 3.03 software to convert relative fluorescence units (RFU) to ng/ml of MMP-13 enzyme. Background fluorescence readings in enzyme minus control reactions were subtracted from each value.

Total collagenase activity in the conditioned media of either human or murine chondrocytes cultures was quantified with an EnzChek<sup>®</sup>Gelatinase/Collagenase Assay Kit (Molecular Probes). The assay employs a DQ<sup>TM</sup> type I collagen fluorescein conjugate substrate that releases fluorescent peptides after collagenase cleavage with increases in fluorescence being proportional to the levels of proteolytic activity. Standards and undiluted culture media were incubated with DQ<sup>TM</sup> type I collagen and fluorescence readings were taken after 2.5 hours (human) or 6 hours (mouse) with a microplate reader (SpectraMax Gemini\_Molecular Devices) at Ex/Em = 490/530 cutoff 515. A standard curve to convert RFU to Units/ml was generated by serial dilution of

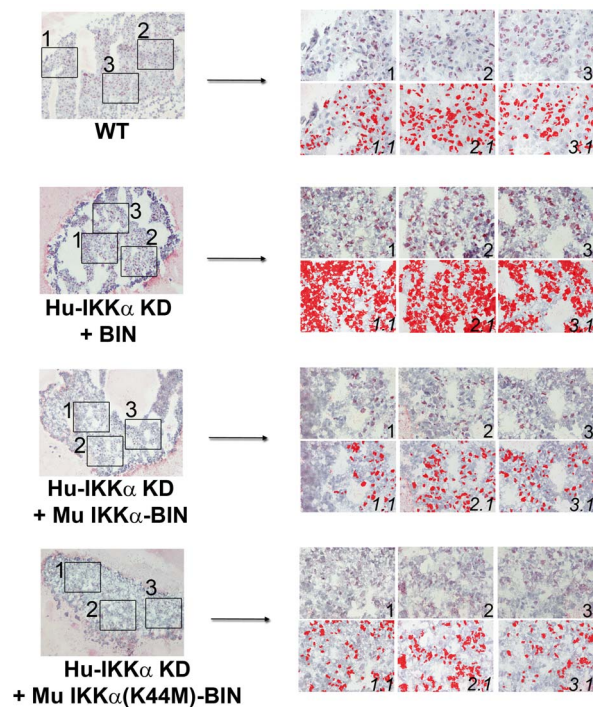

**Figure 8. Effects of IKK $\alpha$  on COL2 protein levels in human OA chondrocyte micromass cultures are independent of its kinase activity.** COL2 immunostaining in 1-week pellet cultures of primary human OA chondrocytes: WT (GL2 control), IKK $\alpha$  KD cells with empty BIN retroviral vector, IKK $\alpha$  KD cells with WT murine IKK $\alpha$ -BIN and IKK $\alpha$  KD cells with kinase-dead murine IKK $\alpha$ (K44M)-BIN. Global views of micromass sphere sections (100X magnification) are shown on the left; and three random fields at 400X magnification submitted to quantitative image analysis are on the right. Antibody stained images are shown in the right side upper rows (labeled 1, 2 & 3), with each 400X field analyzed by Nikon Imaging Software in the lower rows (labeled 1.1, 2.1 & 3.1). For each sample an IHC staining threshold was established based on an antibody isotype control. Antibody staining is in red in conjunction with hematoxylin (blue) nuclear counterstaining. Data are representative examples of multiple sections of micromasses prepared with ACs of 3 OA patients; and results of all such experiments are presented as statistically analyzed bar graphs in Figure 7B. doi:10.1371/journal.pone.0073024.g008

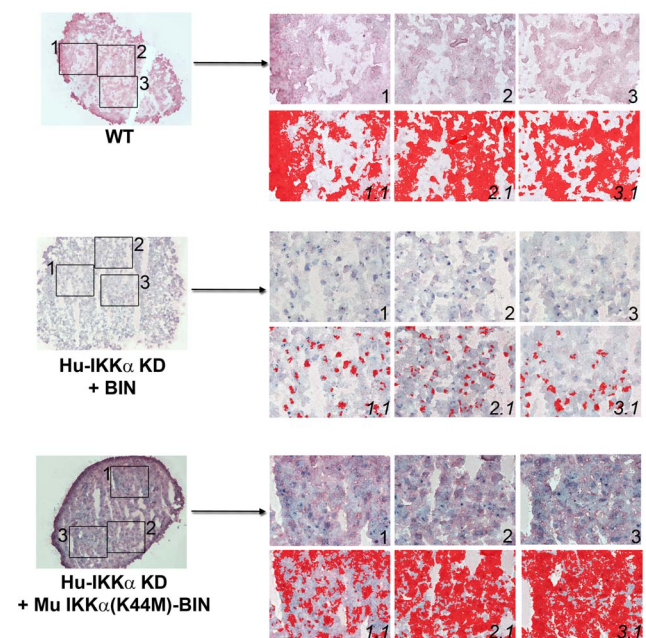

**Figure 9. Effects of IKK $\alpha$  on the accumulation of COL2-3/4C neopeptides in human OA chondrocyte micromass cultures are independent of its kinase activity.** C1,2C antibody detection of COL2-3/4C neopeptides in the same 1-week pellet cultures of primary human chondrocytes employed above in Figure 8. Global views of micromass sphere sections (100X magnification) are shown on the left; and three random fields at 400X magnification submitted to quantitative image analysis are on the right. Antibody stained images are shown in the right side upper rows (labeled 1, 2 & 3), with each 400X field analyzed by Nikon Imaging Software in the lower rows (labeled 1.1, 2.1 & 3.1). For each sample an IHC staining threshold was established based on an antibody isotype control. Antibody staining is in red in conjunction with hematoxylin (blue) nuclear counterstaining. Data are representative examples of multiple sections of micromasses prepared with ACs of 3 OA patients; and results of all such experiments are presented as statistically analyzed bar graphs in Figure 7C. doi:10.1371/journal.pone.0073024.g009

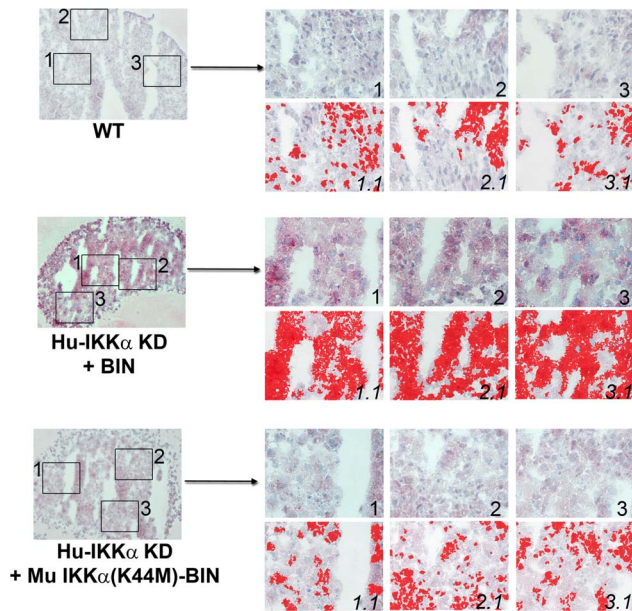

**Figure 10. Effects of IKK $\alpha$  knock-down on TIMP-3 levels in human OA chondrocyte micromass cultures are independent of its kinase activity.** TIMP-3 immunostaining in 1-week pellet cultures of primary human OA chondrocytes: WT (GL2 control), IKK $\alpha$  KD cells with empty BIN retrovector and IKK $\alpha$  KD cells with kinase-dead murine IKK $\alpha$ (K44M)-BIN. Global views of micromass sphere sections (100Xmagnification) are shown on the left, and three random fields at 400Xmagnification submitted to quantitative image analysis are on the right. Antibody stained images are shown in the right side upper rows (labeled 1, 2 & 3), with each 400Xfield analyzed by Nikon Imaging Software in the lower rows (labeled 1.1, 2.1 & 3.1). For each sample an IHC staining threshold was established based on an antibody isotype control. Antibody staining is in red in conjunction with hematoxylin (blue) nuclear counterstaining. Data are representative examples of multiple sections of micromasses prepared with ACs of 3 OA patients; and results of all such experiments are presented as statistically analyzed bar graphs in Figure 7D. doi:10.1371/journal.pone.0073024.g010

1 mM APMA activated Clostridium Collagense Type IV. Background fluorescence readings in enzyme minus control reactions were subtracted from each value.

### Alizarin Red Staining

Calcium-containing mineral deposits were visualized and quantified by Alizarin red staining (Sigma Aldrich) in high density iMAC monolayer cultures differentiated for the indicated times. Briefly, cells were fixed in 10% formaldehyde for 15 min and exposed to a 2% solution of Alizarin red pH 4.2 for 60 min at room temperature. Stained cells were extensively washed with PBS to remove the nonspecific precipitation and matrix mineralization was quantified by extraction of the Alizarin Red S dye. To do so, cells were lysed in PBS containing 0.01% Triton X-100; lysates were cleared by centrifugation at 10,000 $\times$ g for 5 min. at room temperature; and dye-containing supernatants were extracted and aliquoted into 96 well plates for quantification at 492 nm with a plate reader. All measurements were performed in triplicate.

### Statistical Analysis

All data are expressed as the mean  $\pm$  S.E.M (error bars). Means of groups were compared with GraphPad Prism 5.00 statistical software (GraphPad Prism Software, Inc.) by one of several

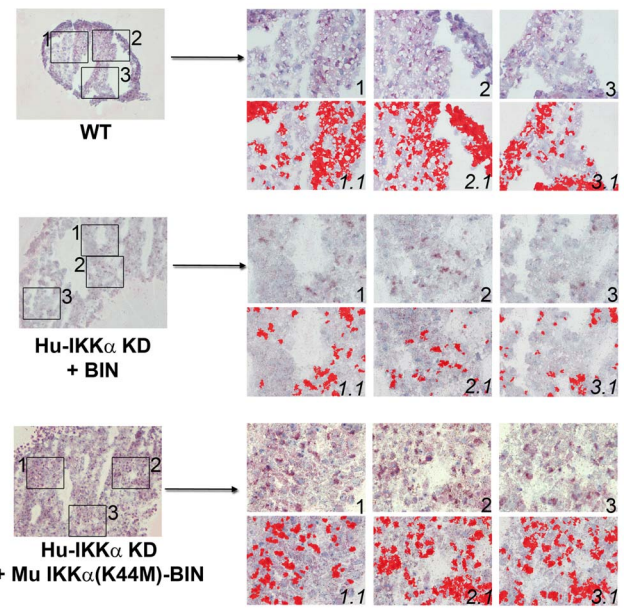

**Figure 11. Effects of IKK $\alpha$  knock-down on Runx2 protein levels in human OA chondrocyte micromass cultures are independent of its kinase activity.** Runx2 immunostaining in 3-week pellet cultures of primary human OA chondrocytes: WT (GL2 control), IKK $\alpha$  KD cells with empty BIN retroviral vector and IKK $\alpha$  KD cells with kinase-dead murine IKK $\alpha$ (K44M)-BIN. Global views of micromass sphere sections (100Xmagnification) are shown on the left, and three random fields at 400Xmagnification submitted to quantitative image analysis are on the right. Antibody stained images are shown in the right side upper rows (labeled 1, 2 & 3), with each 400Xfield analyzed by Nikon Imaging Software in the lower rows (labeled 1.1, 2.1 & 3.1). For each sample an IHC staining threshold was established based on an antibody isotype control. Antibody staining is in red in conjunction with hematoxylin (blue) nuclear counterstaining. Data are representative examples of multiple sections of micromasses prepared with ACs of 3 OA patients; and results of all such experiments are presented as statistically analyzed bar graphs in Figure 7E. doi:10.1371/journal.pone.0073024.g011

different statistical tests including Wilcoxon matched pairs test, ANOVA or Student's t test, with the choice of statistical test depending on unique details or aspects of each experiment, as indicated in the Figure Legends.

## Results

### IKK $\alpha$ in Articular Chondrocytes Functions as a Facilitator of ECM Remodeling and Subsequent Steps in Differentiation Towards Hypertrophy

To investigate the general significance of an IKK $\alpha$  requirement to drive the *in vitro* differentiation of ACs, which we had previously reported for primary human OA derived chondrocytes [40], we compared the *in vitro* ECM and differentiation status of wild type (WT) and 4-OHT-induced IKK $\alpha$  knockout (KO) chondrocytes isolated from IKK $\alpha^{f/f};CreERT2$  5- to 6 day-old mice [66]. As shown in Figure 1A, three days of 4-OHT treatment specifically ablated the expression of IKK $\alpha$  protein in IKK $\alpha^{f/f};CreERT2$  iMACs. Initially, we assessed the relative ECM remodeling capabilities of differentiating pellet cultures of primary WT (EtOH vehicle-treated) and IKK $\alpha$  KO (4-OHT treated) iMACs by IHC analysis with antibodies against specific ECM components (Figure 1B, Left). We observed enhanced COL2 deposition in 4-OHT-induced IKK $\alpha$  KO iMACs in comparison to matched WT

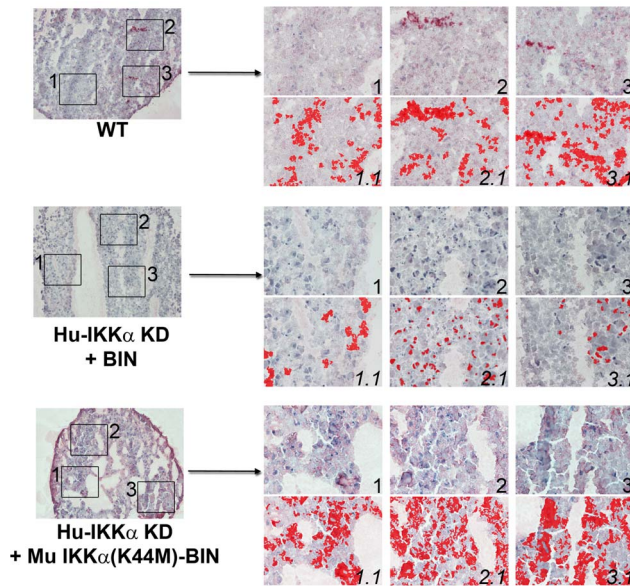

**Figure 12. Effects of IKK $\alpha$  knock-down on COL10 protein levels in human OA chondrocyte micromass cultures are independent of its kinase activity.** COL10 immunostaining in 3-week pellet cultures of primary human OA chondrocytes: WT (GL2 control), IKK $\alpha$  KD cells with empty BIN retroviral vector and IKK $\alpha$  KD cells with kinase-dead murine IKK $\alpha$ (K44M)-BIN. Global views of micromass sphere sections (100X magnification) are shown on the left, and three random fields at 400X magnification submitted to quantitative image analysis are on the right. Antibody stained images are shown in the right side upper rows (labeled 1, 2 & 3), with each 400X field analyzed by Nikon Imaging Software in the lower rows (labeled 1.1, 2.1 & 3.1). For each sample an IHC staining threshold was established based on an antibody isotype control. Antibody staining is in red in conjunction with hematoxylin (blue) nuclear counterstaining. Data are representative examples of multiple sections of micromasses prepared with ACs of 3 OA patients; and results of all such experiments are presented as statistically analyzed bar graphs in Figure 7E.  
doi:10.1371/journal.pone.0073024.g012

controls (Figure 1B, Left and Figure S1). Further, we detected decreased MMP-generated COL2-3/4C neo-epitopes and decreased COL10 protein (a well-accepted marker of hypertrophic chondrocytes) [10,12,76] in the IKK $\alpha$  KO cells compared to WT controls (Figure 1B, Left and Figure S1). For additional verification of these observations, similar experiments were done with independent cultures of differentiating 3-week high-density monolayer iMACs, which produced comparable results (Figure 1B, right and Figure S1). Next, we determined the impact of IKK $\alpha$  ablation on Col10a1 and Runx2 mRNA levels in both iMAC pellet and high-density monolayer cultures (Figure 1C and 1D, respectively). In both cases, the absence of IKK $\alpha$  in 3-week differentiating chondrocytes significantly reduced the expression of both Col10a1 and Runx2 mRNAs (Figures 1C and 1D). To determine if the loss of Col10a1 and Runx2 expression in IKK $\alpha$  KO iMACs was indicative of a clear deficiency in terminal differentiation capacity, we evaluated the same cells for calcium deposition, a defining feature of chondrocyte hypertrophy. Indeed, Alizarin red staining revealed significantly enhanced calcium deposition in WT control iMACs vs. their matched IKK $\alpha$  KO counterparts (Figure 1E).

### IKK $\alpha$ is Required to maintain MMP-10 (stromelysin-2) Levels in Differentiating Articular Chondrocytes

To begin to explore mechanisms of action of IKK $\alpha$  as a positive effector of chondrocyte ECM remodeling and subsequent differentiation, we employed whole genome RNA expression profiling as a primary screen to identify mRNA targets of IKK $\alpha$  in differentiating primary human OA chondrocytes. Gene expression profiling was performed with HgU133plus Affymetrix arrays and total cellular RNA preparations isolated from IKK $\alpha$  KD and matched WT 1-week pellet cultures, which were prepared with primary ACs derived from 3 OA patients. As shown in Figure S2, hierarchical clustering representation of differentially expressed genes revealed that IKK $\alpha$  KD cells were profoundly deficient in the expression of the gene encoding MMP-10 (stromelysin 2) [37]. We validated these microarray results by performing qRT-PCR analysis on total cellular RNAs isolated from 1-week pellet cultures prepared with primary ACs derived from 8 OA patients. In agreement with our array data, qRT-PCR analysis revealed strong repression of MMP10 mRNA in IKK $\alpha$  KD chondrocytes (see Figure 2A).

Next, we used a quantitative ELISA assay to determine the effect of IKK $\alpha$  KD on MMP-10 protein levels present in the conditioned media of an independent set of 1-week pellet cultures derived from 5 OA patients, which showed a comparable pronounced reduction in secreted MMP-10 protein (Figure 2B). These results were independently confirmed by *in situ* IHC staining and quantitative imaging analysis of MMP-10 protein levels in frozen sections of IKK $\alpha$  KD and WT (GL2 control) human OA chondrocyte pellet cultures (Figures 2C and 3).

In parallel with the above experiments, we determined if MMP10 was also a target of IKK $\alpha$  in inducible IKK $\alpha$  KO iMACs. Indeed, 4-OHT-treated IKK $\alpha^{fl/fl};CreERT2$  chondrocytes displayed a very significant reduction in Mmp10 mRNA compared to vehicle-treated WT controls in high density monolayer cultures (Figure 2D) and also in 1-week pellet cultures (data not shown). MMP-10 immunoblotting performed with total cellular proteins isolated from independent high density iMAC monolayer cultures also showed significantly decreased MMP-10 protein levels in the absence of IKK $\alpha$  (Figure 2E).

### IKK $\alpha$ Post-transcriptionally Regulates TIMP-3 Protein Levels

To determine if the mechanism of action of IKK $\alpha$  as a regulator of ECM remodeling involved other targets besides the pro-collagenase activator MMP-10, we next investigated if any of the tissue inhibitors of MMPs (TIMPs) were also subject to regulation by IKK $\alpha$ . Among the four major TIMPs, only TIMP-3 inhibits both MMPs and aggrecanases in chondrocytes [38]. Interestingly, quantitative IHC imaging analysis revealed significant enhancement of TIMP-3 protein levels in the ECM of 1-week IKK $\alpha$  KD pellet cultures in comparison to their matched WT controls (Figures 4A and 5), which was independently confirmed in immunoblots of whole cell lysates (Figure 4B). However, there was no significant change in TIMP3 mRNA levels in IKK $\alpha$  KD samples generated with ACs from 3 OA patients (Figure 4C). Similar experiments performed to assess the levels of the other TIMP proteins (TIMP-1, 2 and 4) failed to show evidence of significant, IKK $\alpha$ -dependent effects in the same 1-week pellet cultures (data not shown).

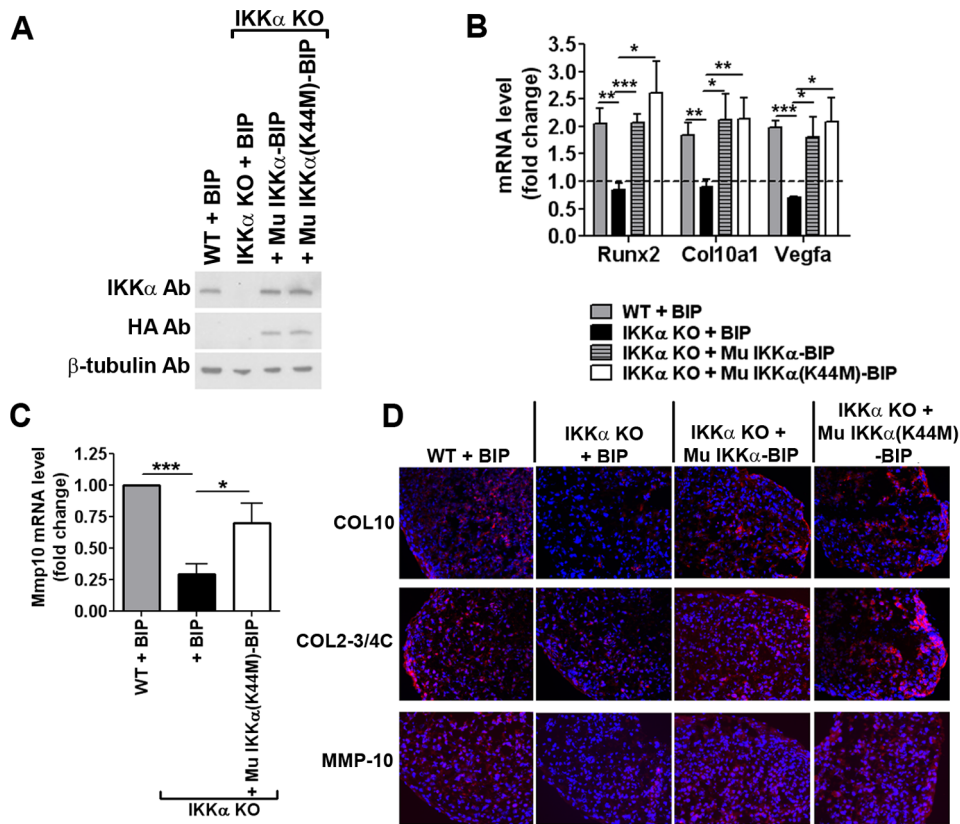

**Figure 13. IKK $\alpha$  positively regulates iMAC ECM remodeling and differentiation independent of its kinase activity.** (A) Representative immunoblots of IKK $\alpha^{fl/fl};CreERT2$  iMACs treated with EtOH (WT control) or 4-OHT (IKK $\alpha$  KO) and then stably transduced with a retroviral vector conferring puromycin resistance (BIP) compared to the same 4-OHT-treated IKK $\alpha$  KO cells transduced with BIP retroviral vectors co-expressing WT murine IKK $\alpha$  (Mu IKK $\alpha$ -BIP) or a murine IKK $\alpha$  kinase-dead mutant [Mu IKK $\alpha$ (K44M)]. Immunoblots were first probed with anti-IKK $\alpha$  antibodies and then sequentially re-probed with anti-HA and  $\beta$ -tubulin specific antibodies. (B) qRT-PCR analysis of Runx2, Col10a1 and Vegfa mRNA levels in 2-week iMAC high density monolayer cultures. As in Panel A, WT Mu IKK $\alpha$ -BIP or Mu IKK $\alpha$ (K44M)-BIP were transduced into 4-OHT-induced IKK $\alpha$  KO cells. Data are represented as fold-change vs. 1-week samples set at 1.0 (dotted line) and shown as mean  $\pm$  S.E.M. (error bars). \* $p < 0.05$ , \*\* $p < 0.01$  and \*\*\* $p < 0.001$  by Student's t-test. (C) qRT-PCR analysis of Mmp10 mRNA in 1-week monolayer cultures, with IKK $\alpha$ (K44M)-BIP in 4-OHT induced IKK $\alpha$  KO iMACs as indicated above. Data are shown as mean  $\pm$  S.E.M. (error bars) derived from multiple experiments performed in duplicate and represented as fold-change vs. WT (EtOH treated) +BIP control. \* $p < 0.05$  and \*\*\* $p < 0.001$  by Student's t-test. (D) Immunostaining with COL10, C1,2C and MMP-10 specific antibodies of 1-week iMAC pellet cultures under the indicated conditions (Original magnification, 200X). Images are representative of 3 experiments. doi:10.1371/journal.pone.0073024.g013

### IKK $\alpha$ Positively Modulates Total Collagenase and MMP-13 Activities in Differentiating Chondrocytes

In light of the effects of IKK $\alpha$  loss on MMP-10 and TIMP-3 levels, we next performed quantitative assays to directly evaluate the effects of IKK $\alpha$  loss on MMP-13 and total collagenase activities. To this end, we utilized conditioned medium of 1- and 3-week IKK $\alpha$  KD and WT control pellet cultures established with ACs obtained from multiple OA patients (Figure 6A and B). We observed statistically significant decreases in MMP-13 activity of between 30 and 40% in the IKK $\alpha$ -deficient cells compared to their matched WT controls at both time points (Figure 6A). To investigate if serum in the cell growth media affected these results, we also evaluated MMP-13 activity as a function of IKK $\alpha$  in the serum-deprived conditioned media from 1-week pellet cultures prepared with the ACs of 2 OA patients and observed ~2-fold diminutions in both MMP-13 and total collagenase activities under these alternative assay conditions (Figure 6B). In agreement, independent experiments performed with iMACs showed that, even though IKK $\alpha$  ablation did not affect Mmp13 expression levels (Figure 6C), the total collagenase activity was decreased in IKK $\alpha$  KO chondrocytes and therefore dependent on IKK $\alpha$

(Figure 6D). Moreover, analogous to our MMP-13 protein and activity data in IKK $\alpha$  KD human OA chondrocytes, IKK $\alpha$  KO iMACs had WT levels of MMP-13 protein but were deficient in MMP-13 enzymatic activity (data not shown).

### IKK $\alpha$ Serine-threonine Kinase Activity is not Required for its Effects on ECM Remodeling and Chondrocyte Differentiation

Next, we performed a series of experiments to determine if the kinase activity of IKK $\alpha$  was required for its functional effects in differentiating human OA chondrocytes and iMACs. To this end, we stably transduced endogenous IKK $\alpha$ -deficient (IKK $\alpha$  KD) human OA chondrocytes with retroviral vectors harboring epitope-tagged forms of either murine WT IKK $\alpha$  or a kinase-dead IKK $\alpha$ (K44M) recombinant mutant [72,77]. Our IKK $\alpha$  KD human chondrocytes were generated by stable transduction with a puromycin resistance retroviral vector co-expressing a human IKK $\alpha$ -targeted shRNA, as described in our earlier work [40]. Thus, we stably introduced WT or mutant forms of murine IKK $\alpha$  with neomycin-resistant retroviral vectors in which the IKK $\alpha$  ORFs are co-expressed together with a *Neo* gene in a bi-cistronic

expression cassette (BIN retroviral vectors) [70,71] (Figure 7). Figure 7A shows immunoblots verifying the expression of the exogenous murine IKK $\alpha$  proteins in endogenous IKK $\alpha$  KD human OA chondrocytes. Enforced expression of exogenous WT murine IKK $\alpha$  or murine IKK $\alpha$ (K44M) proteins in human OA chondrocytes cultured for 1 week in differentiating pellets significantly reduced COL2 deposition in comparison to matched IKK $\alpha$  KD+empty BIN vector control cells, as revealed by *in situ* quantitative IHC imaging analysis (Figures 7B and 8). In analogous pellet cultures, the kinase-dead IKK $\alpha$ (K44M) mutant rescued the levels of MMP-13-dependent COL2-3/4C cleavage products almost up to their amounts in endogenous IKK $\alpha$  WT control cells (Figures 7C and 9). In addition, enforced expression of the IKK $\alpha$ (K44M) mutant reduced the enhanced levels of TIMP-3 protein in IKK $\alpha$  KD cells to their levels in WT control cells (Figures 7D and 10). Moreover, RUNX2 and COL10, markers of chondrocyte differentiation towards a hypertrophic-like state, also displayed comparable protein levels in WT and IKK $\alpha$ (K44M)-rescued cells (Figures 7E, 11 and 12).

In independent experiments, we stably transduced IKK $\alpha$ -ablated iMACs with BIP retroviral vectors that co-express either WT IKK $\alpha$  or the IKK $\alpha$ (K44M) mutant together with a puromycin resistance gene in a bi-cistronic expression cassette [70–72] (Figure 13). We employed puromycin-resistant retroviral vectors with iMACs because, unlike neomycin drug selection that requires up to 2 weeks to obtain resistant cell populations, the selection of puromycin-resistant cells only requires 2 to 3 cell passages during less than 1 week, thereby avoiding any concomitant effects due to additional cell doublings resulting in premature cell ageing. The efficacy and reproducibility of IKK $\alpha$  protein rescue was verified by immunoblotting (Figure 13A). Importantly, due to the significantly higher retroviral transduction frequencies of 4-OHT-induced IKK $\alpha$  KO iMACs, we employed diluted stocks of WT IKK $\alpha$ -BIP and IKK $\alpha$ (K44M)-BIP viruses to rescue IKK $\alpha$  protein levels to near physiological levels (Figure 13A), hence ruling out the possibility of IKK $\alpha$  over-expression artifacts. The analysis of total RNAs isolated from 2-week high density monolayer cultures showed that retroviral-mediated stable transduction of near physiological levels of murine WT IKK $\alpha$  or IKK $\alpha$ (K44M) into IKK $\alpha$  KO iMACs rescued the RNA expression levels of the hypertrophic differentiation markers Runx2, Col10a1 and Vegfa to the amounts detected in WT control iMACs transduced with a BIP empty vector (Figure 13B). Importantly, Mmp10 mRNA levels were also rescued to near physiological levels by the kinase-dead IKK $\alpha$ (K44M) protein (Figure 13C). Moreover, in accord with these results, immunohistochemical analysis of 1-week iMAC pellet cultures showed that the *in situ* protein levels of COL10, COL2-3/4C and MMP-10 were all effectively rescued by the kinase-dead IKK $\alpha$ (K44M) protein (Figure 13D).

## Discussion

### IKK $\alpha$ Modulates Chondrocyte ECM Remodeling by Transcriptional and Post-Transcriptional Mechanisms

As elaborated above in the Introduction, our earlier published work suggested that IKK $\alpha$  acts as a positive effector of AC differentiation by facilitating type II collagen remodeling [39,40], and here, we have investigated mechanism of action of IKK $\alpha$  in this cellular context. In addition to using primary human articular OA chondrocytes, we employed inducible IKK $\alpha$  KO primary chondrocytes derived from 5- to 6-day-old *IKK $\alpha$ <sup>fl/fl</sup>;CreRT2* mice. We observed that the effects of IKK $\alpha$  on ECM remodeling and subsequent aspects of chondrocyte differentiation towards a

hypertrophic-like state are evolutionarily conserved between human OA and murine ACs, and thus the functional effects of IKK $\alpha$  in chondrocytes are not linked to unique properties of cells originating from OA diseased cartilage (Figure 1 and Figure S1). We initially employed whole genome mRNA expression profiling as an unbiased screen for IKK $\alpha$  targets in differentiating human OA-derived ACs (Figure S2). We discovered that the *MMP10* (stromelysin-2) gene, which encodes a pro-collagenase activating protease [37], was a potential target of IKK $\alpha$  and subsequent qRT-PCR analysis validated that MMP10 mRNA was indeed an IKK $\alpha$  target in both human and murine ACs (Figure 2); and MMP10 protein levels were comparably suppressed in IKK $\alpha$  deficient cells (Figures 2 and 3). Additional experiments revealed that the levels of TIMP-3 protein, an inhibitor of MMPs and aggrecanases in chondrocytes, were also dependent on IKK $\alpha$  (Figures 4 and 5). However, unlike MMP-10, TIMP-3 protein levels were controlled by IKK $\alpha$  at the post-transcriptional level, because IKK $\alpha$  KD enhanced the accumulation of TIMP-3 protein with no effect on TIMP3 mRNA levels (Figure 4). In accord with these collective findings, we found that maximal MMP-13 and total collagenase activities in differentiating cultures of ACs were dependent on IKK $\alpha$  (Figure 6).

### IKK $\alpha$ 's Positive Effects on Chondrocyte ECM Remodeling and Differentiation are Independent of its Kinase Activity

To determine if the functional effects of IKK $\alpha$  in chondrocytes required its serine-threonine kinase activity, we rescued its expression in both IKK $\alpha$  KD human OA ACs and in IKK $\alpha$  KO iMACs by stable retroviral transduction with murine WT IKK $\alpha$  or a recombinant IKK $\alpha$  kinase-dead mutant derivative {IKK $\alpha$ (K44M)}. Detailed analyses of ECM status and differentiation potentials revealed that the enforced expression of an exogenous kinase-dead IKK $\alpha$  mutant protein in endogenous IKK $\alpha$ -deficient chondrocytes (of either human or murine origin) rescued type II collagen remodeling and restored the expression of a variety of chondrocyte differentiation markers including Col10, Runx2 and Vegfa (Figures 7–13). Importantly, the IKK $\alpha$ (K44M) mutant reversed the accumulation of TIMP-3 in IKK $\alpha$  KD human OA chondrocytes (Figure 7D and 10) and rescued the expression of Mmp10 mRNA and protein in IKK $\alpha$  KO iMACs (Figure 13C&D). Thus, we believe that our collective findings definitively show that IKK $\alpha$  facilitates MMP-dependent ECM remodeling and subsequent chondrocyte differentiation towards hypertrophy independent of its activity as a serine-threonine kinase. Future work will be necessary to precisely define how IKK $\alpha$  without its kinase activity acts to control the levels of upstream effectors of collagenases to facilitate ECM remodeling, which subsequently drives chondrocyte differentiation towards a hypertrophic-like phenotype. Indeed, a causative relationship between MMP-derived collagen fragments that accumulate during the onset of ECM remodeling and subsequent chondrocyte differentiation towards hypertrophy has been documented [12,78]; and we have previously shown that, similar to IKK $\alpha$  loss, targeted MMP-13 mRNA ablation in human OA ACs also blocks their *in vitro* differentiation [39]. In addition, our prior published results suggested that IKK $\alpha$  or MMP-13 loss in ACs elicited Sox9-mediated inhibition of nuclear  $\beta$ -catenin activity [39], which was previously found necessary for chondrocyte terminal differentiation towards hypertrophy [42], thereby hinting of a mechanistic link between the positive effects of IKK $\alpha$  or MMP-13-mediated ECM remodeling and subsequent steps in chondrocyte differentiation.

## On the Relevance of Functional Effects of IKK $\alpha$ in Chondrocyte ECM Remodeling and Differentiation in the Context of OA Disease Development

The importance of IKK $\alpha$  in ECM remodeling (analogous to that of MMP-13) may only come into play when growth-arrested ACs are coaxed to differentiate towards a hypertrophic-like state. Aspects of this hypertrophic-like differentiation are recapitulated by articular chondrocytes (ACs) *in vitro*, using models of endochondral ossification [40], and *in vivo* under the exacerbated stress associated with the onset and progression of OA disease. Indeed, the loss of normal cartilage homeostasis in OA disease resembles to varying degrees the conversion of periarticular chondrocytes to a differentiated, hypertrophic-like state, and this process is associated with the inappropriate expression and activation of MMP-13 {reviewed in [30,48]}. Although MMP-13 KO mice thrive throughout adulthood with normal cartilage formation and bone growth aside from somewhat enlarged hypertrophic zones in the joints of new born mice, which are eventually resolved by adulthood [28,79], MMP-13 deficiency in mice is protective against cartilage erosion that develops in surgically induced OA disease [27,29]. Thus, we posit that in the context of murine embryonic development, and also consistent with the properties of MMP-13 *in vivo*, IKK $\alpha$  may not have an essential (e.g., irreplaceable) function in ECM remodeling and subsequent chondrocyte differentiation if its functional effects overlap with other regulatory factors during embryonic or post-natal development *in vivo*, and/or if the functional impact threshold of IKK $\alpha$  on ECM remodeling is insufficient to perturb the extent of terminal chondrocyte differentiation required for endochondral ossification in mammalian embryogenesis. Future work will be necessary to determine if the induced *in vivo* ablation of IKK $\alpha$  in the ACs of adult mice has protective effects against the onset or advanced progression of acute surgically induced OA disease.

## Supporting Information

**Figure S1 Effects of IKK $\alpha$  ablation on iMAC matrix production and remodeling.** (A, upper) Additional representative type II collagen (COL2) immunofluorescence staining of 3-week high density monolayer cultures of IKK $\alpha$ <sup>f/f</sup>;CreERT2 iMACs treated with EtOH/vehicle (WT) or 4-OHT (IKK $\alpha$  KO). Merged images are shown. Green: COL2; Blue: DAPI. (A, lower) Representative COL2 immunohistochemical staining of 3-week pellet cultures of WT and IKK $\alpha$  KO IKK $\alpha$ <sup>f/f</sup>;CreERT2

iMACs. (B) Additional representative COL2-3/4C immunohistochemical staining of 3-week pellet cultures of WT and IKK $\alpha$  KO IKK $\alpha$ <sup>f/f</sup>;CreERT2 iMACs. Merged images are shown. Red: COL2-3/4C; Blue: DAPI. All images in A and B are 100X magnifications of originals.

(TIF)

**Figure S2 Microarray gene expression profiling of wild-type GL2 Control vs. IKK $\alpha$  KD (knock-down) differentiating human OA articular chondrocyte micromass cultures.** Hierarchical clustering image comparing the differential expression profiles of 100 genes ( $p < 0.01$ ), which were most affected by IKK $\alpha$  KD (lanes A2, A3, A4) compared to wild-type (WT) control GL2 (C2, C3, C4 lanes) in differentiating 1-week micromass cultures derived from the articular chondrocytes (ACs) of multiple human OA patients (N of 3). Relative expression levels are shown in Log2 scale format with induced and repressed genes in red and green, respectively. Note that MMP10, a collagenase activator, is strongly repressed in the IKK $\alpha$  KD cells and its reduced expression level also co-clusters with that of IKK $\alpha$ .

(TIF)

## Acknowledgments

We gratefully acknowledge Patrizia Rappini, Graziella Salmi and Luciano Pizzi of the Rizzoli Institute for their expert technical assistance. At Stony Brook University, we also thank Ms. Tomo Suma and Laurie Levine for IKK $\alpha$ <sup>f/f</sup>;CreERT2 mouse breeding and Juei-Suei Chen for mouse genotyping, and Dr. Marianna Penzo (CRBA Laboratory and Pathology Dept., S, Orsola Hospital of the Univ. of Bologna) for assisting KBM in the preparation of some of the mycoplasma free WT and K44M mutant IKK $\alpha$  retroviral stocks. This manuscript is dedicated to the memory of Dr. Robert P. Perry (a scientist's scientist and an inspirational human being of the highest integrity). Bob Perry was KBM's postdoctoral mentor and helped him to appreciate many things about how to do good science, including the fact that one's publications are timeless and need to be well written. RIP Bob!

## Author Contributions

Conceived and designed the experiments: EO MO RMB KBM. Performed the experiments: EO MO AA DP Annalisa Facchini SP KBM. Analyzed the data: EO MO AA Annalisa Facchini DP RMB KBM. Contributed reagents/materials/analysis tools: AA FF Andrea Facchini KBM. Wrote the paper: EO MO DP Annalisa Facchini FF MBG RMB KBM. Authors who financially supported the work with their research grant funding: Andrea Facchini FF MBG RMB KBM.

## References

- Streuli C (1999) Extracellular matrix remodelling and cellular differentiation. *Current Opinion in Cell Biology* 11: 634–640.
- Goldring MB, Tsuchimochi K, Ijiri K (2006) The control of chondrogenesis. *Journal of Cellular Biochemistry* 97: 33–44.
- Goldring MB, Sandell LJ (2007) Transcriptional control of chondrocyte gene expression. In: J. Buckwalter ML, JFS, editor. *OA, Inflammation and Degradation: A Continuum*. Amsterdam: IOS Press. pp.118–142.
- Aigner T, Soder S, Gebhard PM, McAlinden A, Haag J (2007) Mechanisms of Disease: role of chondrocytes in the pathogenesis of osteoarthritis—structure, chaos and senescence. *Nat Clin Pract Rheum* 3: 391–399.
- Bos SD, Slagboom PE, Meulenbelt I (2008) New insights into osteoarthritis: early developmental features of an ageing-related disease. *Current Opinion in Rheumatology* 20: 553–559.
- Aigner T, Gerwin N (2007) Growth plate cartilage as developmental model in osteoarthritis research—potentials and limitations. *Current Drug Targets* 8: 377–385.
- Terkeltaub RA (2007) Aging, inflammation, and altered chondrocyte differentiation in articular cartilage calcification and osteoarthritis; J Buckwalter ML, J F Stoltz editors, editor. Amsterdam: IOS Press. 31–42 p.
- Drissi H, Zuscik M, Rosier R, O'Keefe R (2005) Transcriptional regulation of chondrocyte maturation: potential involvement of transcription factors in OA pathogenesis. *Mol Aspects Med* 26: 169–179.
- Goldring MB, Marcu KB (2009) Cartilage homeostasis in health and rheumatic diseases. *Arthritis Res Ther* 11: 224.
- Tchetina EV, Squires G, Poole AR (2005) Increased type II collagen degradation and very early focal cartilage degeneration is associated with upregulation of chondrocyte differentiation related genes in early human articular cartilage lesions. *J Rheumatol* 32: 876–886.
- Aigner T, Bartnik E, Sohler F, Zimmer R (2004) Functional genomics of osteoarthritis: on the way to evaluate disease hypotheses. *Clin Orthop Relat Res*: S138–143.
- Tchetina EV, Kobayashi M, Yasuda T, Meijers T, Pidoux I, et al. (2007) Chondrocyte hypertrophy can be induced by a cryptic sequence of type II collagen and is accompanied by the induction of MMP-13 and collagenase activity: Implications for development and arthritis. *Matrix Biology* 26: 247–258.
- Wang X, Manner PA, Horner A, Shum L, Tuan RS, et al. (2004) Regulation of MMP-13 expression by RUNX2 and FGF2 in osteoarthritic cartilage. *Osteoarthritis and Cartilage* 12: 963–973.
- van der Kraan PM, van den Berg WB (2012) Chondrocyte hypertrophy and osteoarthritis: role in initiation and progression of cartilage degeneration? *Osteoarthritis and cartilage/OARS, Osteoarthritis Research Society* 20: 223–232.
- Lefebvre V, Smits P (2005) Transcriptional control of chondrocyte fate and differentiation. *Birth Defects Research Part C: Embryo Today: Reviews* 75: 200–212.

16. Dy P, Wang W, Bhattaram P, Wang Q, Wang L, et al. (2012) Sox9 Directs Hypertrophic Maturation and Blocks Osteoblast Differentiation of Growth Plate Chondrocytes. *Developmental cell* 22: 597–609.
17. Murakami S, Lefebvre V, de Crombrughe B (2000) Potent inhibition of the master chondrogenic factor Sox9 gene by interleukin-1 and tumor necrosis factor- $\alpha$ . *J Biol Chem* 275: 3687–3692.
18. Sitcheran R, Cogswell PC, Baldwin AS Jr (2003) NF- $\kappa$ B mediates inhibition of mesenchymal cell differentiation through a posttranscriptional gene silencing mechanism. *Genes Dev* 17: 2368–2373.
19. Hess K, Ushmorov A, Fiedler J, Brenner RE, Wirth T (2009) TNF $\alpha$  promotes osteogenic differentiation of human mesenchymal stem cells by triggering the NF- $\kappa$ B signaling pathway. *Bone* 45: 367–376.
20. Peng H, Tan L, Osaki M, Zhan Y, Ijiri K, et al. (2008) ESE-1 is a potent repressor of type II collagen gene (COL2A1) transcription in human chondrocytes. *Journal of Cellular Physiology* 215: 562–573.
21. Otero M, Plumb DA, Tsuchimochi K, Dragomir CL, Hashimoto K, et al. (2012) E74-like Factor 3 (ELF3) Impacts on Matrix Metalloproteinase 13 (MMP13) Transcriptional Control in Articular Chondrocytes under Proinflammatory Stress. *Journal of Biological Chemistry* 287: 3559–3572.
22. Saito T, Fukai A, Mabuchi A, Ikeda T, Yano F, et al. (2010) Transcriptional regulation of endochondral ossification by HIF-2[ $\alpha$ ] during skeletal growth and osteoarthritis development. *Nat Med* 16: 678–686.
23. Yang S, Kim J, Ryu J-H, Oh H, Chun C-H, et al. (2010) Hypoxia-inducible factor-2[ $\alpha$ ] is a catabolic regulator of osteoarthritic cartilage destruction. *Nat Med* 16: 687–693.
24. Mitchell PG, Magna HA, Reeves LM, Lopresti-Morrow LL, Yocum SA, et al. (1996) Cloning, expression, and type II collagenolytic activity of matrix metalloproteinase-13 from human osteoarthritic cartilage. *The Journal of Clinical Investigation* 97: 761–768.
25. Reboul P, Pelletier JP, Tardif G, Cloutier JM, Martel-Pelletier J (1996) The new collagenase, collagenase-3, is expressed and synthesized by human chondrocytes but not by synoviocytes. A role in osteoarthritis. *J Clin Invest* 97: 2011–2019.
26. Neuhold LA, Killar L, Zhao W, Sung ML, Warner L, et al. (2001) Postnatal expression in hyaline cartilage of constitutively active human collagenase-3 (MMP-13) induces osteoarthritis in mice. *J Clin Invest* 107: 35–44.
27. Little CB, Barai A, Burkhardt D, Smith SM, Fosang AJ, et al. (2009) Matrix metalloproteinase 13-deficient mice are resistant to osteoarthritic cartilage erosion but not chondrocyte hypertrophy or osteophyte development. *Arthritis Rheum* 60: 3723–3733.
28. Stickens D, Behonick DJ, Ortega N, Heyer B, Hartenstein B, et al. (2004) Altered endochondral bone development in matrix metalloproteinase 13-deficient mice. *Development* 131: 5883–5895.
29. Wang M, Sampson E, Jin H, Li J, Ke Q, et al. (2013) MMP13 is a critical target gene during the progression of osteoarthritis. *Arthritis Research & Therapy* 15: R5.
30. Goldring MB, Otero M, Plumb DA, Dragomir C, Favero M, et al. (2011) Roles of inflammatory and anabolic cytokines in cartilage metabolism: signals and multiple effectors converge upon MMP-13 regulation in osteoarthritis. *Eur Cell Mater* 21: 202–220.
31. Jimenez MJG, Balbin M, Lopez JM, Alvarez J, Komori T, et al. (1999) Collagenase 3 is a Target of Cbfa1, a Transcription Factor of the runt Gene Family Involved in Bone Formation. *Mol Cell Biol* 19: 4431–4442.
32. Liacini A, Sylvester J, Li WQ, Zafarullah M (2002) Inhibition of interleukin-1-stimulated MAP kinases, activating protein-1 (AP-1) and nuclear factor kappa B (NF- $\kappa$ B) transcription factors down-regulates matrix metalloproteinase gene expression in articular chondrocytes. *Matrix Biology* 21: 251–262.
33. Mengshol JA, Vincenti MP, Brinckerhoff CE (2001) IL-1 induces collagenase-3 (MMP-13) promoter activity in stably transfected chondrocytic cells: requirement for Runx-2 and activation by p38 MAPK and JNK pathways. *Nucleic Acids Research* 29: 4361–4372.
34. Fan Z, Tardif G, Boileau C, Bidwell JP, Geng C, et al. (2006) Identification in human osteoarthritic chondrocytes of proteins binding to the novel regulatory site AGRE in the human matrix metalloproteinase 13 proximal promoter. *Arthritis & Rheumatism* 54: 2471–2480.
35. Knäuper V, Will H, López-Otin C, Smith B, Atkinson SJ, et al. (1996) Cellular Mechanisms for Human Procollagenase-3 (MMP-13) Activation: Evidence that MT1-MMP (MMP-14) and gelatinase A (MMP-2) are able to generate active enzyme. *Journal of Biological Chemistry* 271: 17124–17131.
36. Nagase H, Woessner JF (1999) Matrix Metalloproteinases. *Journal of Biological Chemistry* 274: 21491–21494.
37. Barksby HE, Milner JM, Patterson AM, Peake NJ, Hui W, et al. (2006) Matrix metalloproteinase 10 promotion of collagenolysis via procollagenase activation: implications for cartilage degradation in arthritis. *Arthritis Rheum* 54: 3244–3253.
38. Baker AH, Edwards DR, Murphy G (2002) Metalloproteinase inhibitors: biological actions and therapeutic opportunities. *J Cell Sci* 115: 3719–3727.
39. Borzì RM, Olivotto E, Pagani S, Vitelozzi R, Neri S, et al. (2010) Matrix metalloproteinase 13 loss associated with impaired extracellular matrix remodeling disrupts chondrocyte differentiation by concerted effects on multiple regulatory factors. *Arthritis & Rheumatism* 62: 2370–2381.
40. Olivotto E, Borzì RM, Vitelozzi R, Pagani S, Facchini A, et al. (2008) Differential requirements for IKK $\alpha$  and IKK $\beta$  in the differentiation of primary human osteoarthritic chondrocytes. *Arthritis & Rheumatism* 58: 227–239.
41. Tallheden T, Dennis JE, Lennon DP, Sjogren-Jansson E, Caplan AI, et al. (2003) Phenotypic plasticity of human articular chondrocytes. *J Bone Joint Surg Am* 85-A Suppl 2: 93–100.
42. Akiyama H, Lyons JP, Mori-Akiyama Y, Yang X, Zhang R, et al. (2004) Interactions between Sox9 and beta-catenin control chondrocyte differentiation. *Genes Dev* 18: 1072–1087.
43. Bastide P, Darido C, Pannequin J, Kist R, Robine S, et al. (2007) Sox9 regulates cell proliferation and is required for Paneth cell differentiation in the intestinal epithelium. *The Journal of Cell Biology* 178: 635–648.
44. Connelly MA, Marcu KB (1995) CHUK, a new member of the helix-loop-helix and leucine zipper families of interacting proteins, contains a serine-threonine kinase catalytic domain. *Cell Mol Biol Res* 41: 537–549.
45. Scheiderei C (2006) IkappaB kinase complexes: gateways to NF- $\kappa$ B activation and transcription. *Oncogene* 25: 6685–6705.
46. Ghosh S, Hayden MS (2008) New regulators of NF-[kappa]B in inflammation. *Nat Rev Immunol* 8: 837–848.
47. Vallabhapurapu S, Karin M (2009) Regulation and Function of NF- $\kappa$ B Transcription Factors in the Immune System. *Annual Review of Immunology* 27: 693–733.
48. Marcu KB, Otero M, Olivotto E, Borzì RM, Goldring MB (2010) NF- $\kappa$ B Signaling: Multiple Angles to Target OA. *Curr Drug Targets* 11: 599–613.
49. Israel A (2010) The IKK Complex, a Central Regulator of NF- $\kappa$ B Activation. *Cold Spring Harb Perspect Biol* 2: a000158.
50. Pomerantz JL, Baltimore D (2002) Two pathways to NF- $\kappa$ B. *Mol Cell* 10: 693–694.
51. Bonizzi G, Karin M (2004) The two NF- $\kappa$ B activation pathways and their role in innate and adaptive immunity. *Trends Immunol* 25: 280–288.
52. Yamamoto Y, Verma UN, Prajapati S, Kwak YT, Gaynor RB (2003) Histone H3 phosphorylation by IKK- $\alpha$  is critical for cytokine-induced gene expression. *Nature* 423: 655–659.
53. Anest V, Hanson JL, Cogswell PC, Steinbrecher KA, Strahl BD, et al. (2003) A nucleosomal function for IkappaB kinase- $\alpha$  in NF- $\kappa$ B-dependent gene expression. *Nature* 423: 659–663.
54. Hoberg JE, Yeung F, Mayo MW (2004) SMRT derepression by the IkappaB kinase  $\alpha$ : a prerequisite to NF- $\kappa$ B transcription and survival. *Molecular Cell* 16: 245–255.
55. Huang W-C, Ju T-K, Hung M-C, Chen C-C (2007) Phosphorylation of CBP by IKK $\alpha$  Promotes Cell Growth by Switching the Binding Preference of CBP from p53 to NF- $\kappa$ B. *Molecular Cell* 26: 75–87.
56. Hu Y, Baud V, Delhase M, Zhang P, Deerinc T, et al. (1999) Abnormal morphogenesis but intact IKK activation in mice lacking the IKK $\alpha$  subunit of IkappaB kinase. *Science* 284: 316–320.
57. Takeda K, Takeuchi O, Tsujimura T, Itami S, Adachi O, et al. (1999) Limb and skin abnormalities in mice lacking IKK $\alpha$ . *Science* 284: 313–316.
58. Li Q, Lu Q, Hwang JY, Buscher D, Lee KF, et al. (1999) IKK1-deficient mice exhibit abnormal development of skin and skeleton. *Genes Dev* 13: 1322–1328.
59. Hu Y, Baud V, Oga T, Kim KI, Yoshida K, et al. (2001) IKK $\alpha$  controls formation of the epidermis independently of NF- $\kappa$ B. *Nature* 410: 710–714.
60. Sil AK, Maeda S, Sano Y, Roop DR, Karin M (2004) IkappaB kinase- $\alpha$  acts in the epidermis to control skeletal and craniofacial morphogenesis. *Nature* 428: 660–664.
61. Descargues P, Sil AK, Sano Y, Korchynski O, Han G, et al. (2008) IKK $\alpha$  is a critical coregulator of a Smad4-independent TGF $\beta$ -Smad2/3 signaling pathway that controls keratinocyte differentiation. *Proceedings of the National Academy of Sciences* 105: 2487–2492.
62. Cao Y, Bonizzi G, Seagroves TN, Gretchen FR, Johnson R, et al. (2001) IKK $\alpha$  Provides an Essential Link between RANK Signaling and Cyclin D1 Expression during Mammary Gland Development. *Cell* 107: 763–775.
63. Liu Z, Lavine KJ, Hung IH, Ornitz DM (2007) FGF18 is required for early chondrocyte proliferation, hypertrophy and vascular invasion of the growth plate. *Dev Biol* 302: 80–91.
64. Reinhold MI, Naski MC (2007) Direct Interactions of Runx2 and Canonical Wnt Signaling Induce FGF18. *J Biol Chem* 282: 3653–3663.
65. Bobick BE, Thornhill TM, Kulyk WM (2007) Fibroblast growth factors 2, 4, and 8 exert both negative and positive effects on limb, frontonasal, and mandibular chondrogenesis via MEK-ERK activation. *J Cell Physiol* 211: 233–243.
66. Penzo M, Molteni R, Suda T, Samaniego S, Raucci A, et al. (2010) Inhibitor of NF-[kappa]B Kinases {alpha} and {beta} Are Both Essential for High Mobility Group Box 1-Mediated Chemotaxis. *J Immunol* 184: 4497–4509.
67. Olivotto E, Vitelozzi R, Fernandez P, Falcieri E, Battistelli M, et al. (2007) Chondrocyte hypertrophy and apoptosis induced by GRO $\alpha$  require three-dimensional interaction with the extracellular matrix and a co-receptor role of chondroitin sulfate and are associated with the mitochondrial splicing variant of cathepsin B. *J Cell Physiol* 210: 417–427.
68. Salvat C, Pigenet A, Humbert L, Berenbaum F, Thirion S (2005) Immature murine articular chondrocytes in primary culture: a new tool for investigating cartilage. *Osteoarthritis and Cartilage* 13: 243–249.
69. Gosset M, Berenbaum F, Thirion S, Jacques C (2008) Primary culture and phenotyping of murine chondrocytes. *Nat Protocols* 3: 1253–1260.
70. Li J, Peet GW, Balzarano D, Li X, Massa P, et al. (2001) Novel NEMO/IkappaB kinase and NF- $\kappa$ B target genes at the pre-B to immature B cell transition. *J Biol Chem* 276: 18579–18590.

71. Li X, Massa PE, Hanidu A, Pect GW, Aro P, et al. (2002) IKK $\alpha$ , IKK $\beta$ , and NEMO/IKK $\gamma$  are each required for the NF- $\kappa$ B-mediated Inflammatory response program. *J Biol Chem* 277: 45129–45140.
72. Massa PE, Li X, Hanidu A, Siamas J, Pariali M, et al. (2005) Gene expression profiling in conjunction with physiological rescues of IKK $\alpha$  null cells with wild type or mutant IKK $\alpha$  reveals distinct classes of IKK $\alpha$ /NF- $\kappa$ B-dependent genes. *J Biol Chem* 280: 14057–14069.
73. Tonelli R, McIntyre A, Camerin C, Walters ZS, Di Leo K, et al. (2012) Antitumor Activity of Sustained N-Myc Reduction in Rhabdomyosarcomas and Transcriptional Block by Antigen Therapy. *Clinical Cancer Research* 18: 796–807.
74. Ijiri K, Zerbini LF, Peng H, Otu HH, Tsuchimochi K, et al. (2008) Differential expression of GADD45 $\beta$  in normal and osteoarthritic cartilage: Potential role in homeostasis of articular chondrocytes. *Arthritis & Rheumatism* 58: 2075–2087.
75. Dussault A-A, Pouliot M (2006) Rapid and simple comparison of messenger RNA levels using real-time PCR. *Biol Proced Online* 8: 1–10.
76. Dong Y-F, Soung DY, Schwarz EM, O'Keefe RJ, Drissi H (2006) Wnt induction of chondrocyte hypertrophy through the Runx2 transcription factor. *Journal of Cellular Physiology* 208: 77–86.
77. McKenzie FR, Connelly MA, Balzarano D, Muller JR, Geleziunas R, et al. (2000) Functional isoforms of IkappaB kinase alpha (IKK $\alpha$ ) lacking leucine zipper and helix-loop-helix domains reveal that IKK $\alpha$  and IKK $\beta$  have different activation requirements. *Mol Cell Biol* 20: 2635–2649.
78. Gauci SJ, Golub SB, Tutolo L, Little CB, Sims NA, et al. (2008) Modulating chondrocyte hypertrophy in growth plate and osteoarthritic cartilage. *J Musculoskelet Neuronal Interact* 8: 308–310.
79. Inada M, Wang Y, Byrne MH, Rahman MU, Miyaura C, et al. (2004) Critical roles for collagenase-3 (Mmp13) in development of growth plate cartilage and in endochondral ossification. *Proc Natl Acad Sci U S A* 101: 17192–17197.
